# Supplementary material for: Sustainable valorization of cherry (Prunus avium L.) pomace waste via the combined use of (NA)DESs and bio-ILs
Source: Royal Society of Chemistry journal article supplement (doi:10.1039/d4gc00526k), 2024-01-01
Supplement: d4gc00526k1.pdf [file d4gc00526k1.pdf]

## Supporting information

### Sustainable valorization of cherry (*Prunus avium* L.) pomace waste *via* the combined use of (NA)DESs and bio-ILs

Angelica Mero<sup>1</sup>, Andrea Mezzetta<sup>1,2</sup>, Marinella De Leo<sup>1,2,3,#</sup>, Alessandra Braca<sup>1,2,3</sup>, Lorenzo Guazzelli<sup>1,2,#</sup>

<sup>1</sup>Department of Pharmacy, Via Bonanno 33, 56126, Pisa, Italy

<sup>2</sup>Centre for Instrumentation Sharing, University of Pisa (CISUP), Lungarno Pacinotti 43, 56127 Pisa, Italy

<sup>3</sup> Interdepartmental Research Center Nutrafood "Nutraceuticals and Food for Health", University of Pisa, Via del Borghetto 80, 56124 Pisa, Italy

#corresponding author

#### Table of contents

|                                                                                                                                   |               |
|-----------------------------------------------------------------------------------------------------------------------------------|---------------|
| Characterization methods.....                                                                                                     | pages S2-S4   |
| NMR of water-soluble sugars extracted from CPW.....                                                                               | page S5       |
| NMR of all tested (NA)DESs.....                                                                                                   | pages S5-S12  |
| NMR, FTIR and TGA of ChLev.....                                                                                                   | pages S13-S14 |
| NMR of recovered (NA)DESs after polyphenols extraction.....                                                                       | page S14      |
| Tables of the amounts of phenols identified in the different CPW extracts obtained by classical solvents and (NA)DESs.....        | pages S15-16  |
| FTIR of undissolved residue obtained after polyphenols extraction with ChCl:EG.....                                               | page S17      |
| Table of the main absorption bands and assignments related to the residue obtained after polyphenols extraction with ChCl:EG..... | page S17      |
| TG and DTG curves of undissolved residue obtained after polyphenols extraction with ChCl:EG.....                                  | page S18      |
| NMR of the recovered ChArg.....                                                                                                   | page S18      |
| NMR of the recovered ChLev.....                                                                                                   | page S19      |
| Table of rheological data of ionogel.....                                                                                         | page S19      |
| References.....                                                                                                                   | page S20      |

## Characterization methods

### NMR Spectroscopy

<sup>1</sup>H NMR spectra were recorded in D<sub>2</sub>O or MeOD, on a Bruker 400 MHz NMR spectrometer at 25 °C. The experiments were performed using 50 mg/mL as sample concentration. <sup>13</sup>C NMR spectra were recorded at 101 MHz. <sup>1</sup>H and <sup>13</sup>C NMR chemical shifts (ppm) are referenced to the either residual D<sub>2</sub>O ( $\delta_{\text{H}}$  4.79) or MeOD ( $\delta_{\text{H}}$  3.31,  $\delta_{\text{C}}$  49.0).

### UHPLC-HR-ESI-MS analyses

The chemical characterization of all CPW extracts in terms of specialized metabolites was performed by means of UHPLC-HR-Orbitrap-ESI-MS (Q Exactive Plus MS, Thermo Fischer Scientific Inc., Germany). Methanolic solution (2 mg/mL) of all extracts were injected into the LC-MS system (5  $\mu$ L injection volume) and analyzed on a C-18 Kinetex<sup>®</sup> Biphenyl column (100 x 2.1 mm, 2.6  $\mu$ m particle size) provided of a Security Guard<sup>™</sup> Ultra Cartridge (Phenomenex, Italy). For the elution formic acid in ACN 0.1% v/v (solvent A) and formic acid in H<sub>2</sub>O 0.1% v/v (solvent B) were used developing a linear solvent gradient from 5 to 50% A within 11 min, at a flow rate 0.5 mL/min. For the anthocyanin analysis a linear solvent gradient from 5 to 20% A within 5 min was applied. The autosampler and column oven temperature was maintained at 4 and 35 °C, respectively. HR mass spectra were acquired in ESI negative ionization mode (scan range of *m/z* 120-1200) for phenol extracts and in positive ionization mode for the anthocyanin extracts, operating in full (70000 resolution, 220 ms maximum injection time) and data dependent-MS/MS scan (17500 resolution, 60 ms maximum injection time). Ionization parameters were optimized as follows: spray voltage 3500 V, capillary temperature 300 °C, sheath gas (N<sub>2</sub>) 20 arbitrary unit, auxiliary gas (N<sub>2</sub>) 3 arbitrary unit, collisionally activated dissociation (HCD) 18 eV, stepped normalized collisional energy (NCE) 20, 40, and 100%. Data were elaborated with Xcalibur 4.1 software. The quantitative amount of the major phenols identified in all extracts was determined by constructing calibration curves using chlorogenic acid, naringenin, rutin, and cyanidin 3-*O*-glucoside as external standards for quantification of hydroxycinnamic acids, flavonoid aglycones, flavonol *O*-glycosides, and anthocyanins, respectively. Stock methanol solutions were first prepared at 1 mg/mL concentration and successively diluted by serial dilution to obtain solutions at different concentrations in the following range: 0.001-200  $\mu$ g/mL for chlorogenic acid, 0.5-50  $\mu$ g/mL for naringenin and rutin, 25-250  $\mu$ g/mL for cyanidin 3-*O*-glucoside. All solutions were prepared in triplicate. To construct calibration curves, the standard concentrations were plotted with respect to the areas obtained by MS peak integration. The relation between variables was obtained by linear simple correlation ( $R^2= 0.999$  for chlorogenic acid;  $R^2 = 0.9782$  for naringenin,  $R^2 = 0.9892$  for rutin, and  $R^2= 0.9960$  for cyanidin glucoside). The amounts of each component were finally expressed as  $\mu$ g/g  $\pm$  standard deviation (SD) of dried cherry-waste. Data were obtained by Microsoft<sup>®</sup> Office Excel.

## **Fourier Transform Infrared Spectroscopy**

The ATR-Fourier transform infrared spectroscopy (FTIR) spectra were recorded with an Agilent Technologies IR Cary 660 FTIR spectrophotometer using a macro-ATR accessory, a Diamond crystal. The spectra were measured in the range from 4000 to 500  $\text{cm}^{-1}$  with 32 scans both for samples and background, measured first to eliminate the moisture and  $\text{CO}_2$  from the samples.

## **Thermogravimetric analysis**

Thermogravimetric analyses (TGA) were carried out using a TA Instruments Q500 TGA (weighing Precision  $\pm 0.01\%$ , sensitivity 0.1 mg, baseline dynamic drift  $< 50$  mg). TG measurements were performed heating 5-15 mg of each sample at a rate of 10  $^{\circ}\text{C min}^{-1}$ , from 30  $^{\circ}\text{C}$  to 800  $^{\circ}\text{C}$  under nitrogen flow (80  $\text{cm}^3 \text{min}^{-1}$ ) in a platinum crucible. The instrument was calibrated using weight standards (1 g, 500 mg and 100 mg) and the temperature calibration was performed using curie point of nickel standard. All the standards were supplied by TA Instruments Inc. TGA experiments were carried out in triplicate.

## **Determination of chemical composition of biomass**

### **-Water-soluble carbohydrate content**

Free water-soluble sugar content was determined following the procedure reported by Saïed et al.<sup>1</sup> with slight modifications. More in detail, 1 g of CPW was treated with 50 mL of water at 90  $^{\circ}\text{C}$  for 30 min. The soluble fraction was recovered by filtration. The supernatant was evaporated under reduced pressure and the obtained sugars were analyzed by  $^1\text{H NMR}$  (Figure S1). The test was performed in duplicate. The water-soluble sugars content was quoted as wt% of the dried biomass weight (calculated as g of water-soluble sugars/g of the dried biomass\*100).

### **-Pectin content**

Pectin content was determined using the procedure reported by Yang et al.<sup>2</sup> with slight modifications. More in detail, 500 mg of CPW obtained after the removal of free water-soluble sugars was mixed with water (1:15 w/v) and the pH was adjusted to 2 with citric acid. The resulting solution was heated at 90  $^{\circ}\text{C}$  for 60 min, and then centrifuged at 4000 rpm for 30 min. The supernatant was collected and three volumes (v/v) of absolute ethanol were added to reprecipitate pectin at 4  $^{\circ}\text{C}$  overnight. The pectin precipitate was collected by centrifugation and washed twice with 80% (v/v) ethanol. Finally, the pectin was dried in an oven at 100  $^{\circ}\text{C}$ . The test was performed in duplicate. The pectin content was quoted as wt% of the dried CPW weight (calculated as g of pectin/g of the dried CPW\*100).

### **-Holocellulose content**

Holocellulose content was determined based upon the delignifying procedures described by Yokoyama et al.<sup>3</sup>. More in detail, in a round bottom flask, 500 mg of residue, obtained after removal of free sugars and pectin, and 20 mL water were mixed and heated with stirring at 90 $^{\circ}\text{C}$ . Then, a sodium chlorite solution (20

wt%, 5 mL) and 2 mL of glacial acetic acid were added. The addition of sodium chlorite solution and glacial acetic acid was repeated at 30, 60, and 90 min after the first addition. 2 h after the first addition, the round bottom flask was cooled in a cold-water bath. Glass microfibers filter was used to filter the reaction mixture. The residue, holocellulose, was washed with hot water ( $3 \times 100$  mL) and acetone (20 mL) and dried at 100° C. The test was performed in duplicate. The holocellulose content was quoted as wt% of the dried CPW weight (calculated as g of holocellulose/g of the dried CPW\*100).

### **Rheological properties of ionogel**

The rheological properties of ChLev based-ionogel were measured using a modular compact rheometer (MCR 302, Anton Paar, Turin, Italy) equipped with a plate–plate geometry ( $\varnothing = 5$  cm) and a protective hood. All experiments were carried out at room temperature controlled by a water-cooled Peltier system (H-PTD200, Anton Paar). Oscillatory tests (amplitude sweep and frequency sweep) were performed to measure the storage modulus  $G'$  and the loss modulus  $G''$ . At first, the amplitude sweep test was performed between 0.1 and 1 %, applying a constant frequency of 1 Hz to determine the correct value of shear strain within the linear viscoelastic region LVER required for the frequency sweep test. This latter test was carried out over a range of oscillation frequencies between 100 and 0.1 rad/s at 0.1% of shear strain. Then, to classify the gel as physical or chemical one and to determine its strength, the dependence of the elastic modulus was calculated by a power-law model as follow:

$$G' = G_0 \cdot \omega^a \quad \text{Eq. 1}$$

where  $G_0$  ( $\text{Pa} \cdot \text{s}^a$ ) is a constant representing the gel strength, i.e. the measurement of the elastic energy stored in a unit volume of the network, which is the intercept with the log  $G'$ -axis and defined mathematically by Eq. (2), and  $a$  is the slope of the log  $G'$ -log frequency curve, which is characteristic for each material<sup>4,5</sup>.

$$G_0 = \lim_{\omega \rightarrow \infty} G'(\omega) \quad \text{Eq. 2}$$

The parameter  $a$  indicates the behaviour of the gel in the plateau region in terms of the internal structure of the material related to the type of interactions present inside the material. Hence, if  $a$  is zero, the material exhibits a solid-like material behaviour typical of a “true gel” because it is formed by covalent interactions, while when  $a > 0$ , physical interactions are responsible for maintaining the gel-like structure<sup>6</sup>. Finally, the complex viscosity was fitted to a power-law model, as follow:

$$\eta^* = q \cdot \omega^{p-1} \quad \text{Eq. 3}$$

where  $q$  ( $\text{Pa} \cdot \text{s}^p$ ) provides the resistance deformation at frequencies near to zero, and  $p$  is a parameter whose physical meaning is related to the behaviour of the material. The material presents a shear-thinning behaviour if “ $p$ ”  $> 1$  while the material shows a shear-thickening behaviour if “ $p$ ”  $< 1$ .

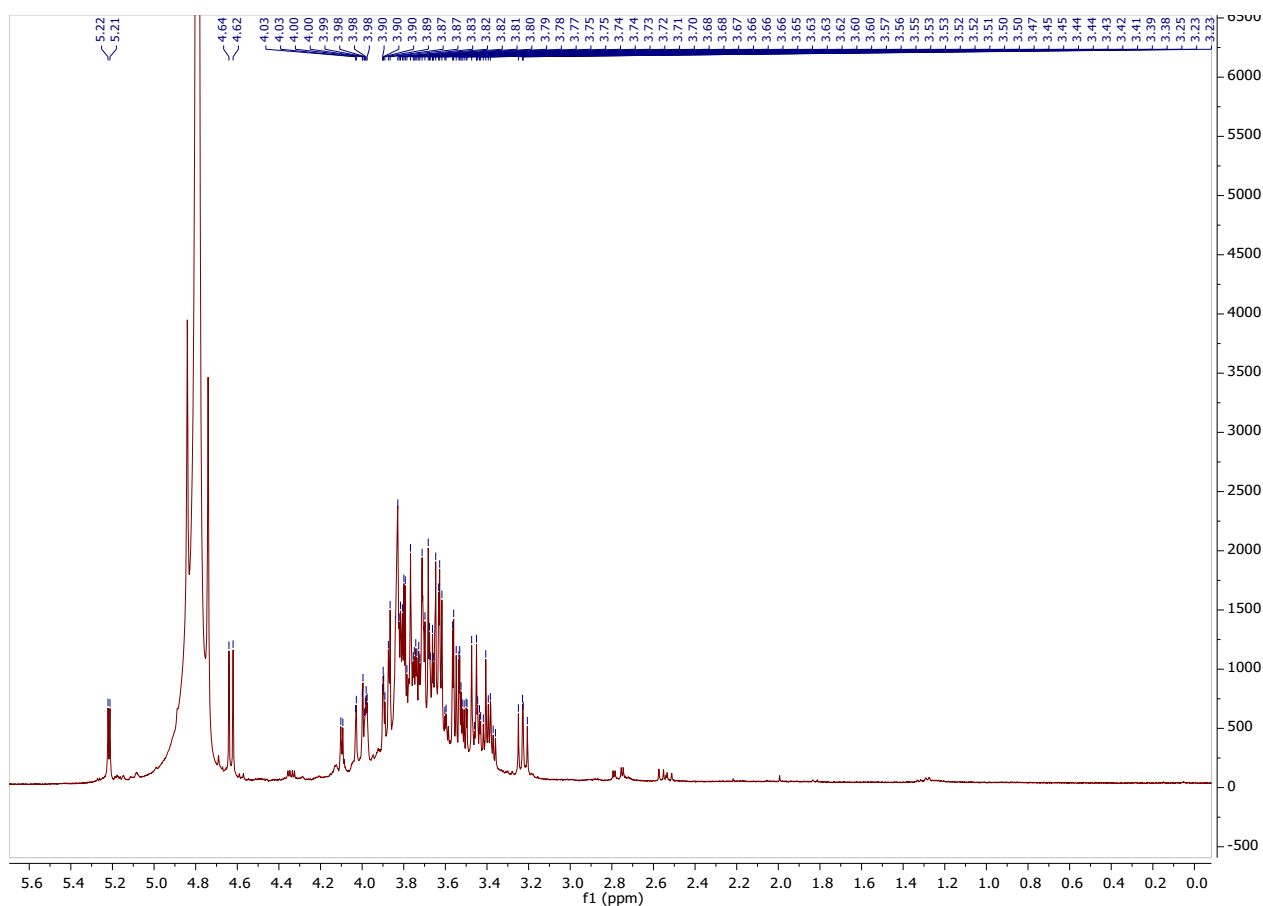

Figure S1.  $^1\text{H}$  NMR of water-soluble sugars extracted from CPW.

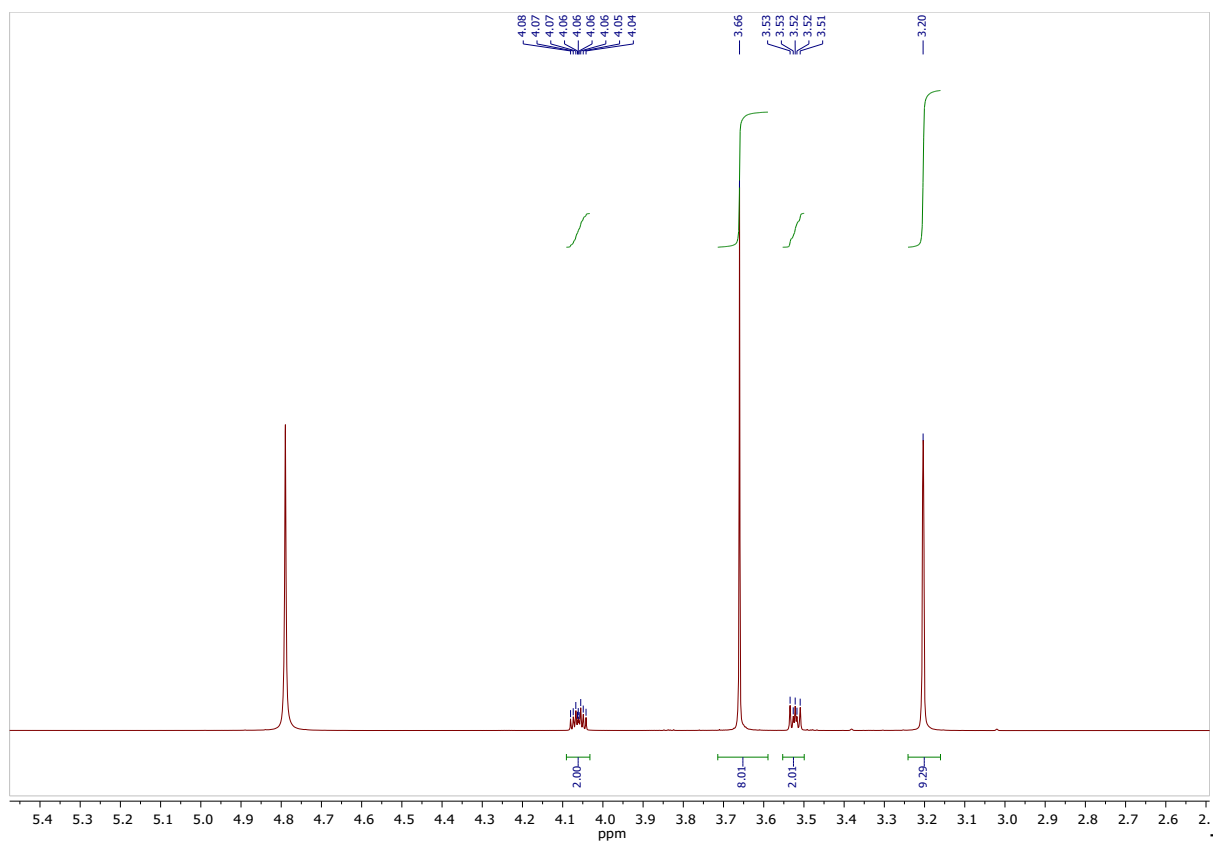

Figure S2.  $^1\text{H}$  NMR of ChCl:EG 1:2 in  $\text{D}_2\text{O}$ .

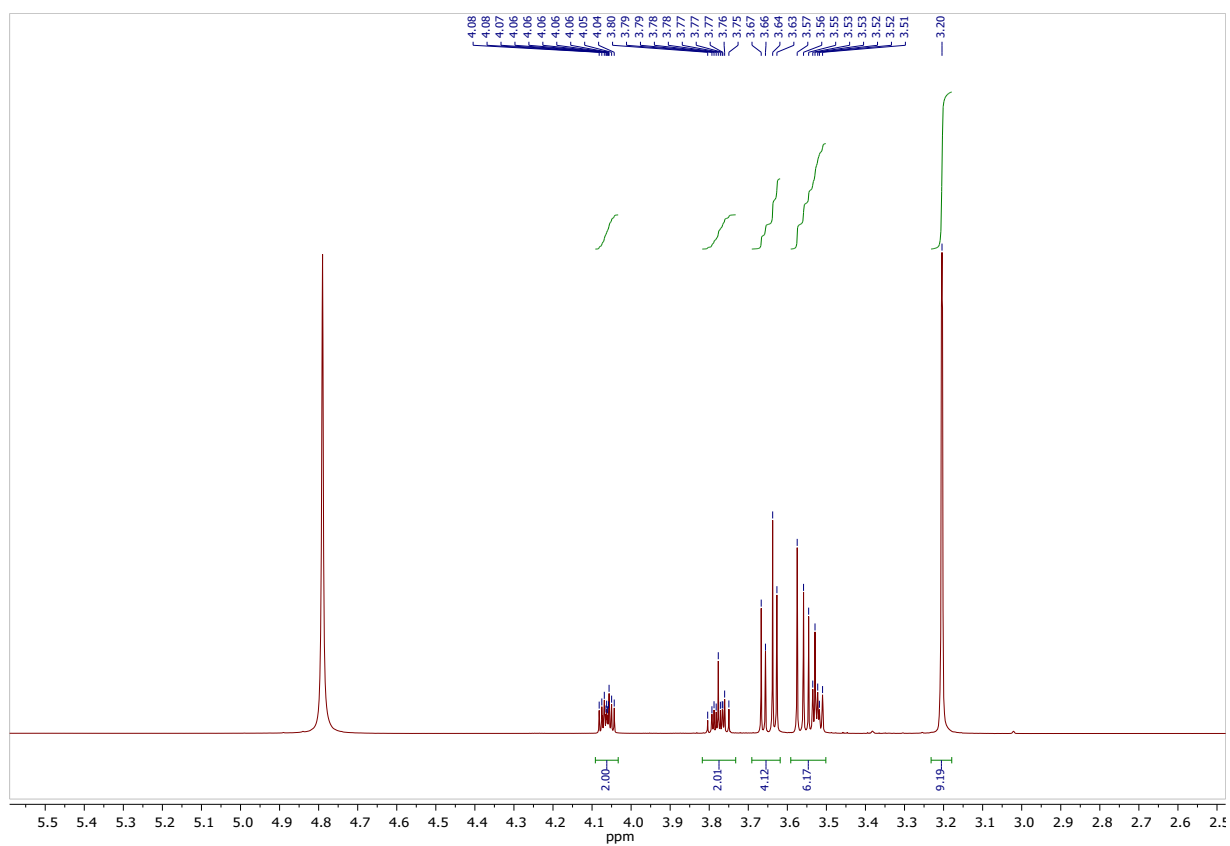

**Figure S3.**  $^1\text{H}$  NMR of ChCl:Gly 1:2 in  $\text{D}_2\text{O}$ .

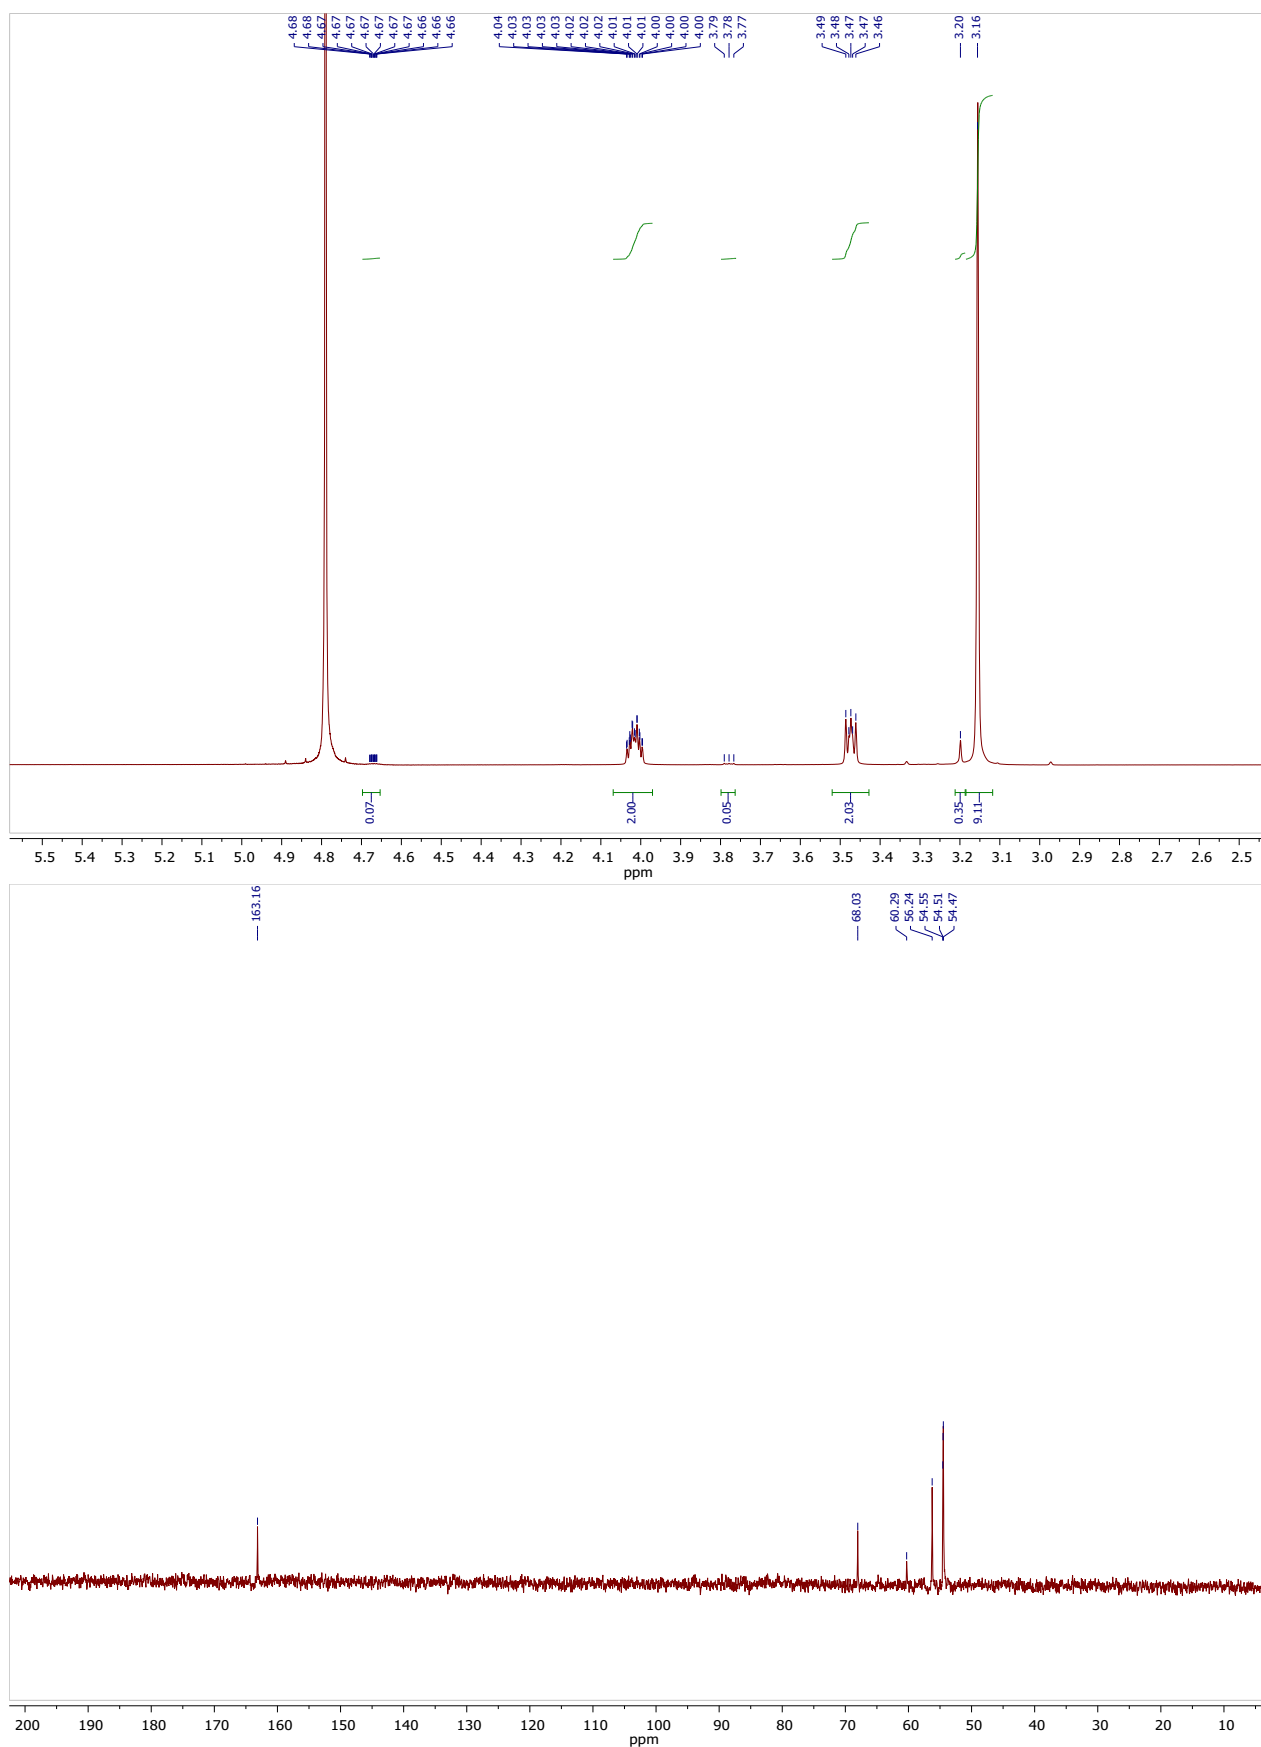

**Figure S4.** <sup>1</sup>H and <sup>13</sup>C NMR of ChCl:Oa 1:1 in D<sub>2</sub>O.

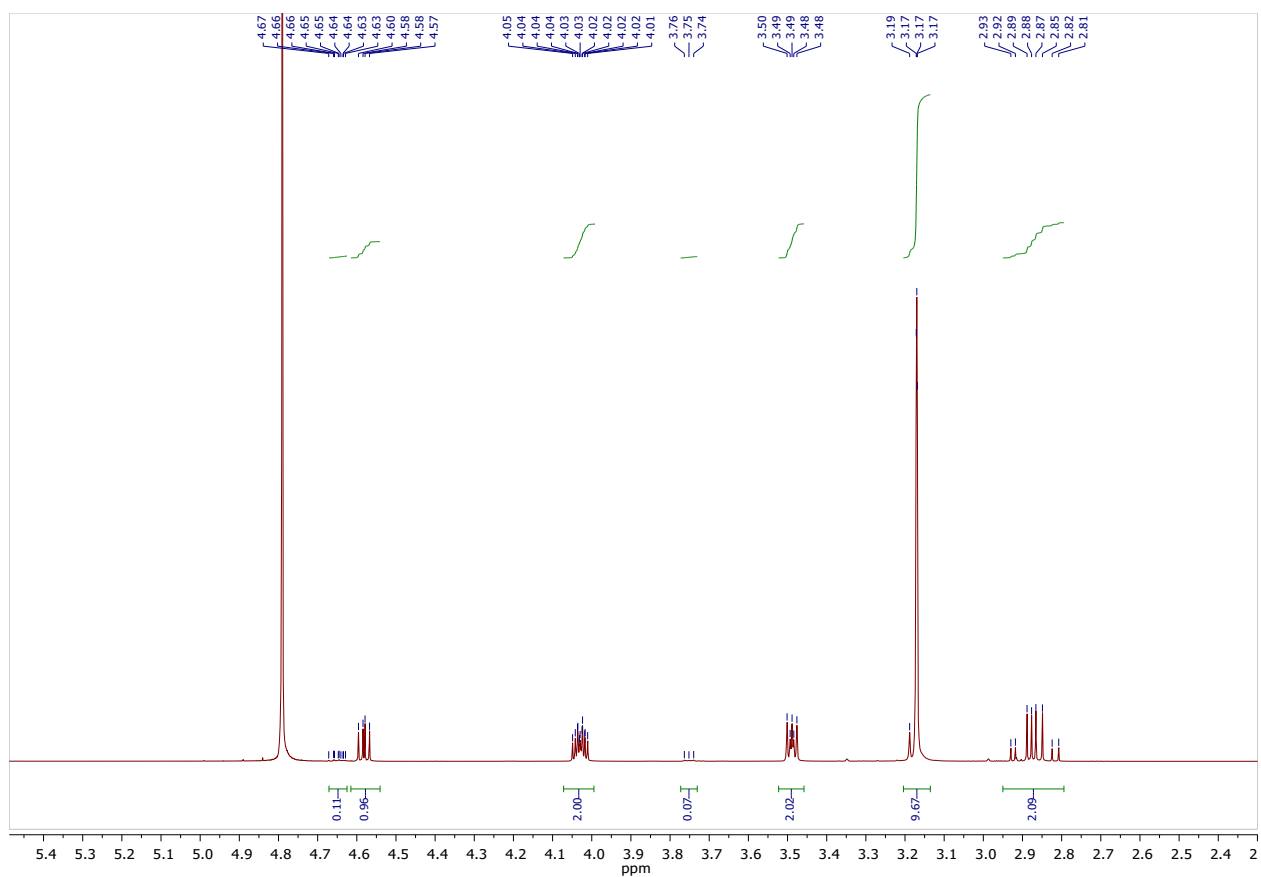

Figure S5.  $^1\text{H}$  NMR of ChCl:Ma 1:1 in  $\text{D}_2\text{O}$ .

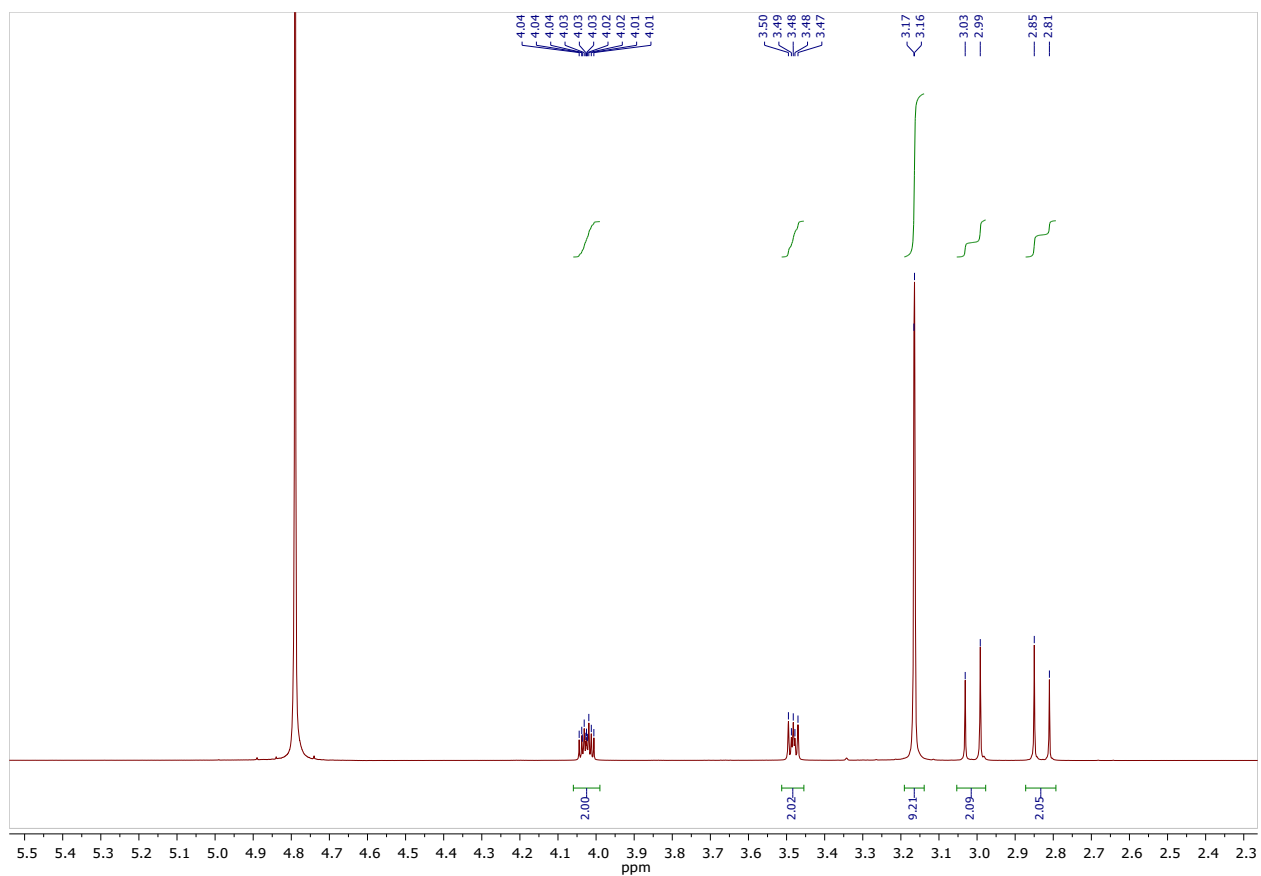

Figure S6.  $^1\text{H}$  NMR of ChCl:CaxH $_2$ O 1:1 in  $\text{D}_2\text{O}$ .



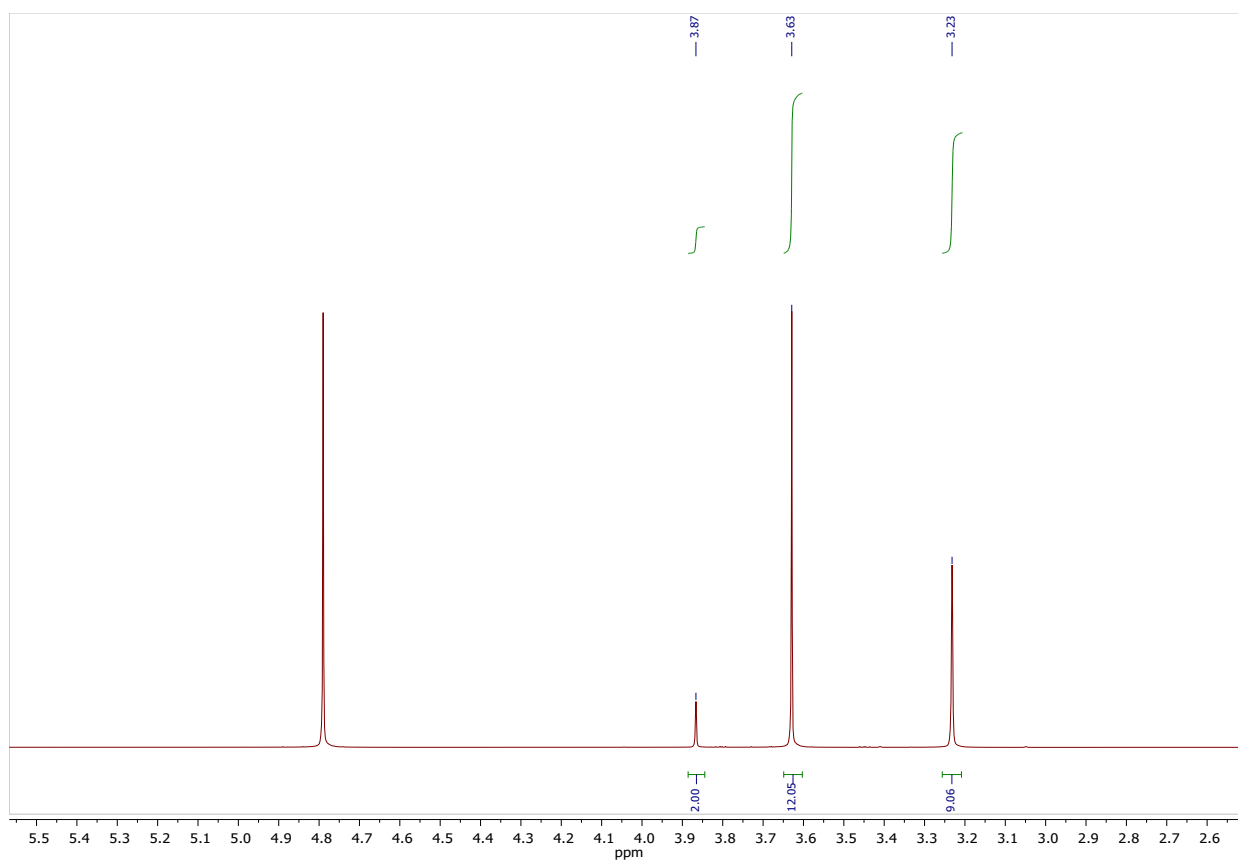

**Figure S7.**  $^1\text{H}$  NMR of Bet:EG 1:3 in  $\text{D}_2\text{O}$ .

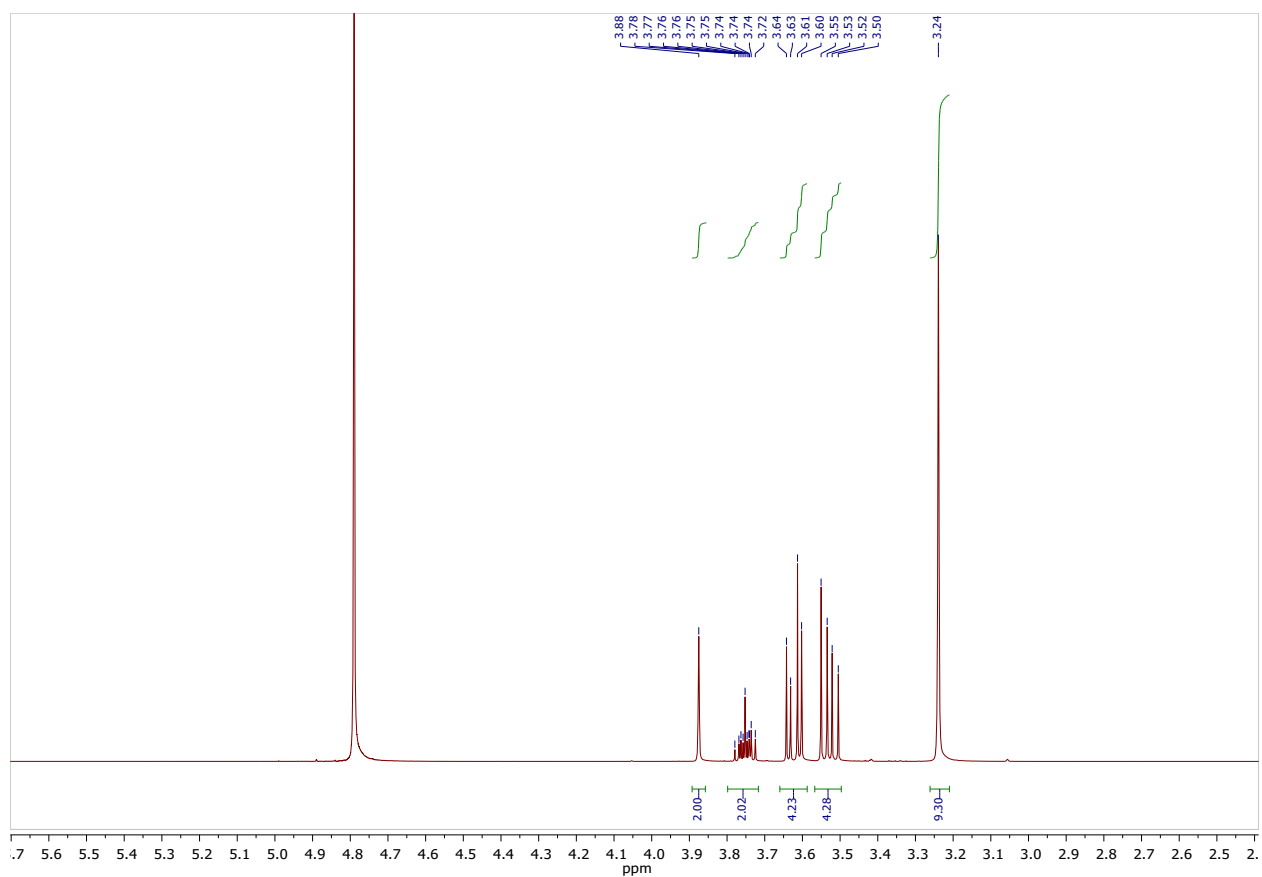

**Figure S8.**  $^1\text{H}$  NMR of Bet:Gly 1:2 in  $\text{D}_2\text{O}$ .

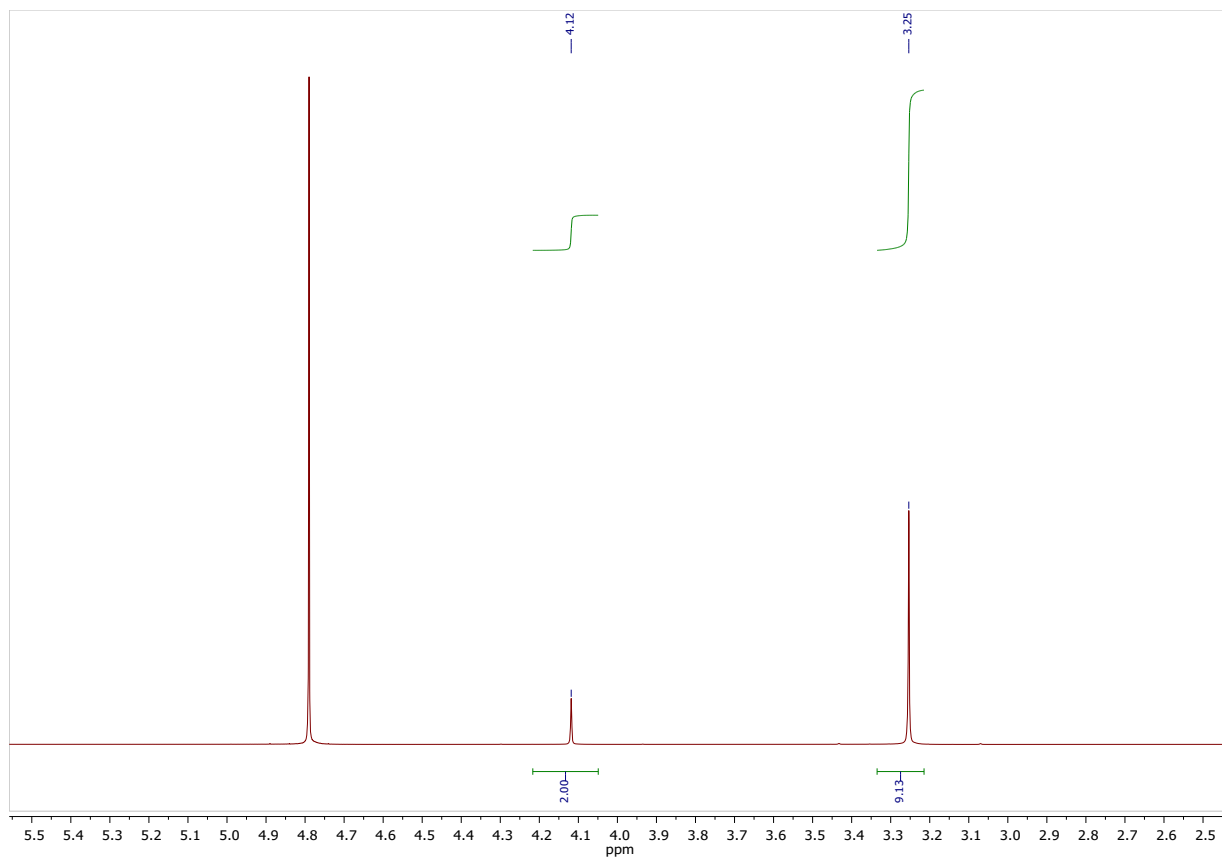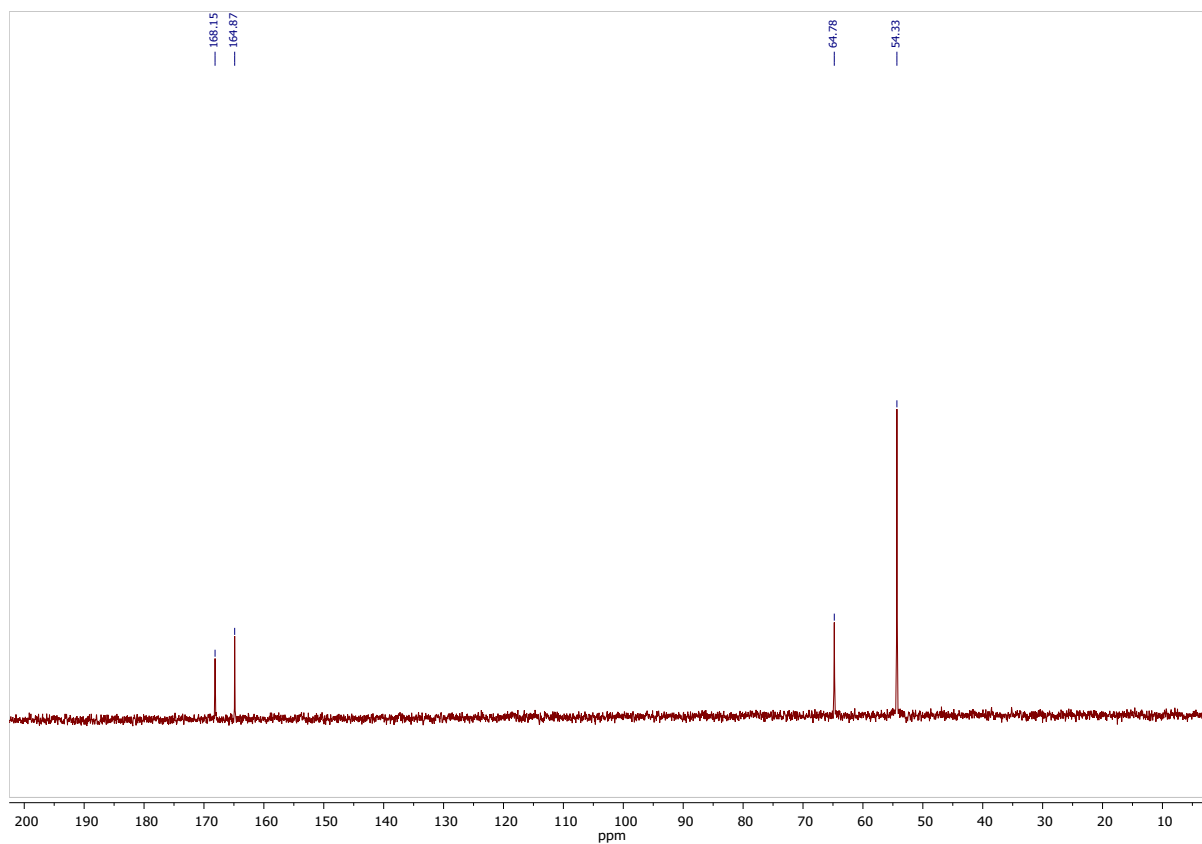

**Figure S9.**  $^1\text{H}$  and  $^{13}\text{C}$  NMR of Bet:Oa 1:1 in  $\text{D}_2\text{O}$ .

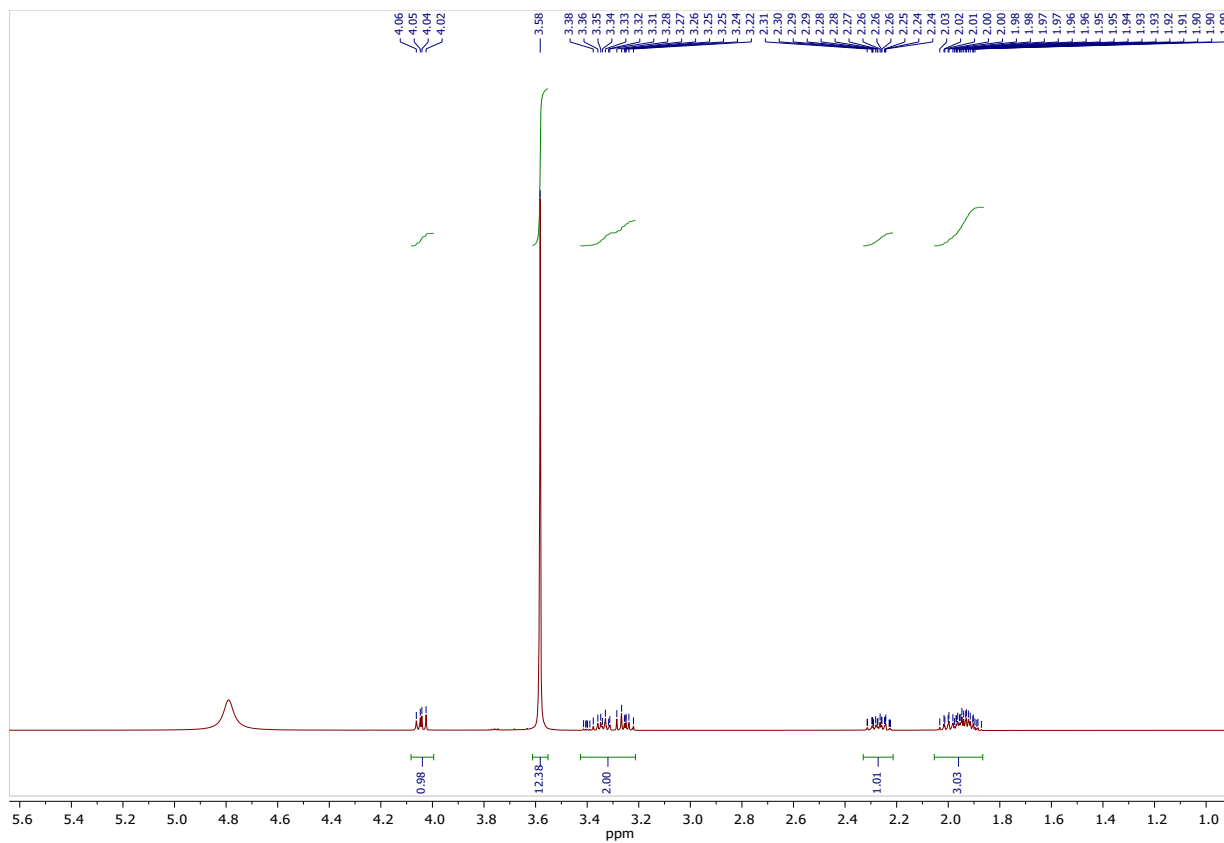

Figure S10.  $^1\text{H}$  NMR of L-Pro:EG 1:3 in  $\text{D}_2\text{O}$ .

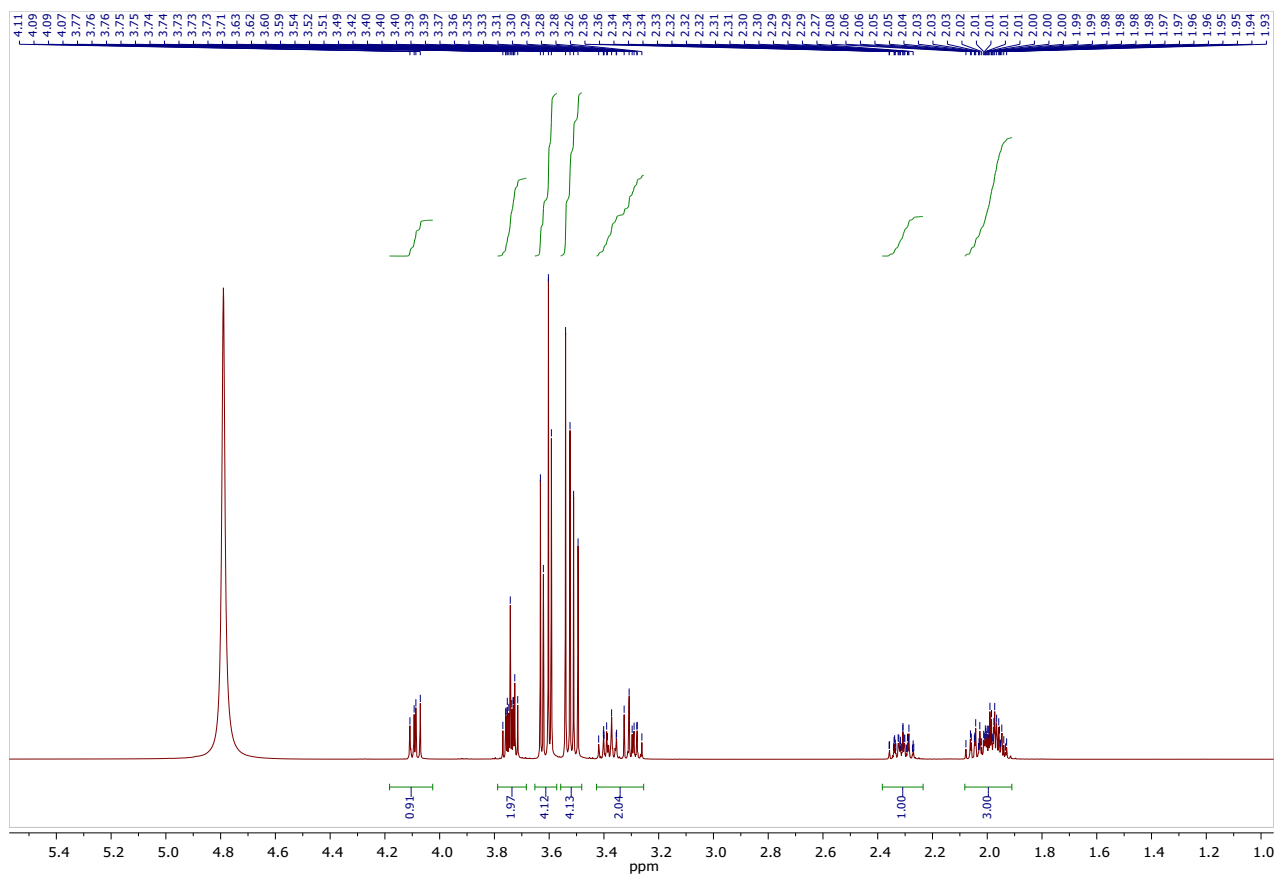

Figure S11.  $^1\text{H}$  NMR of L-Pro:Gly 1:2 in  $\text{D}_2\text{O}$ .

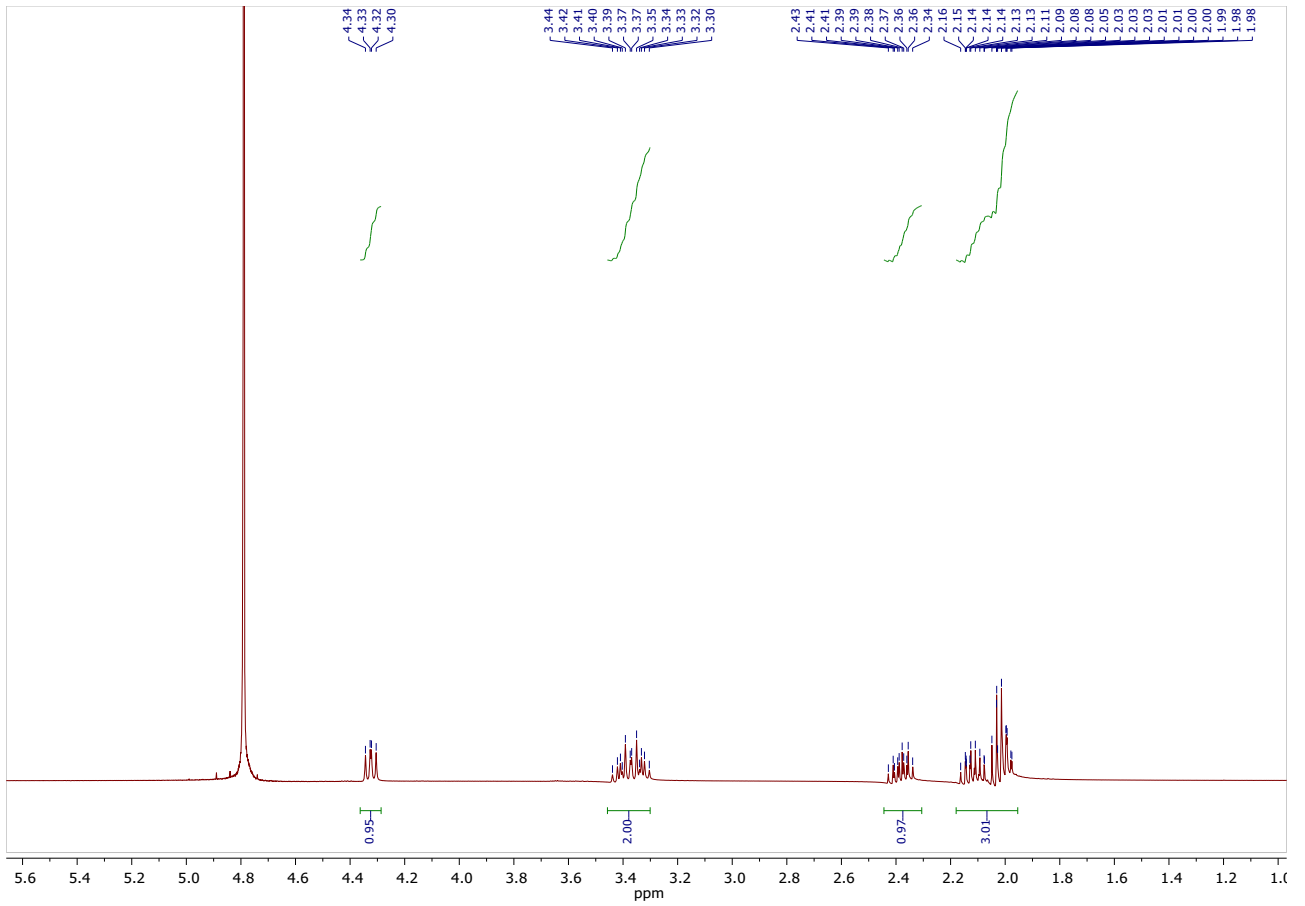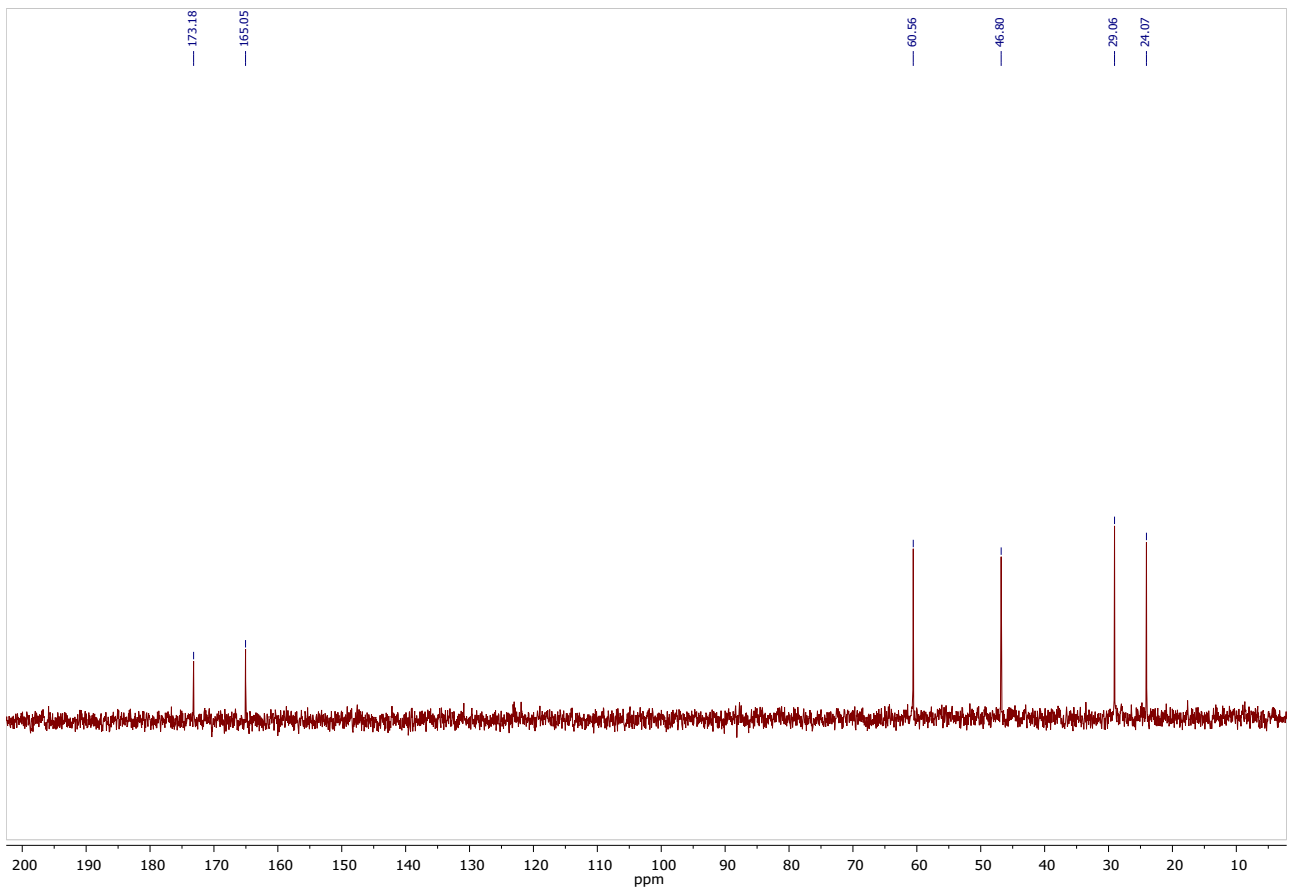

**Figure S12.**  $^1\text{H}$  and  $^{13}\text{C}$  NMR of L-Pro:Oa 1:1 in  $\text{D}_2\text{O}$ .

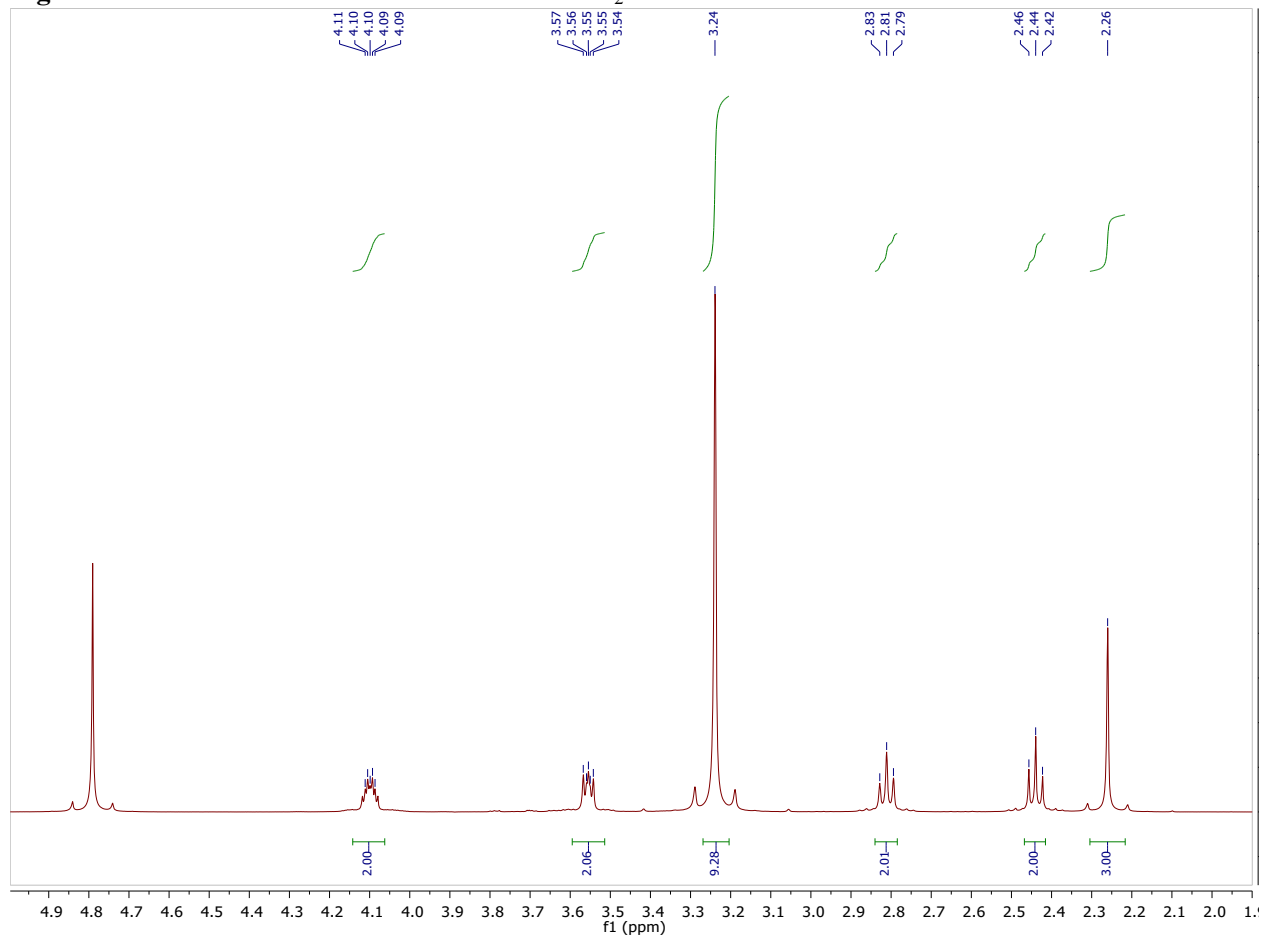

**Figure S13.**  $^1\text{H}$  NMR of ChLev in  $\text{D}_2\text{O}$ .

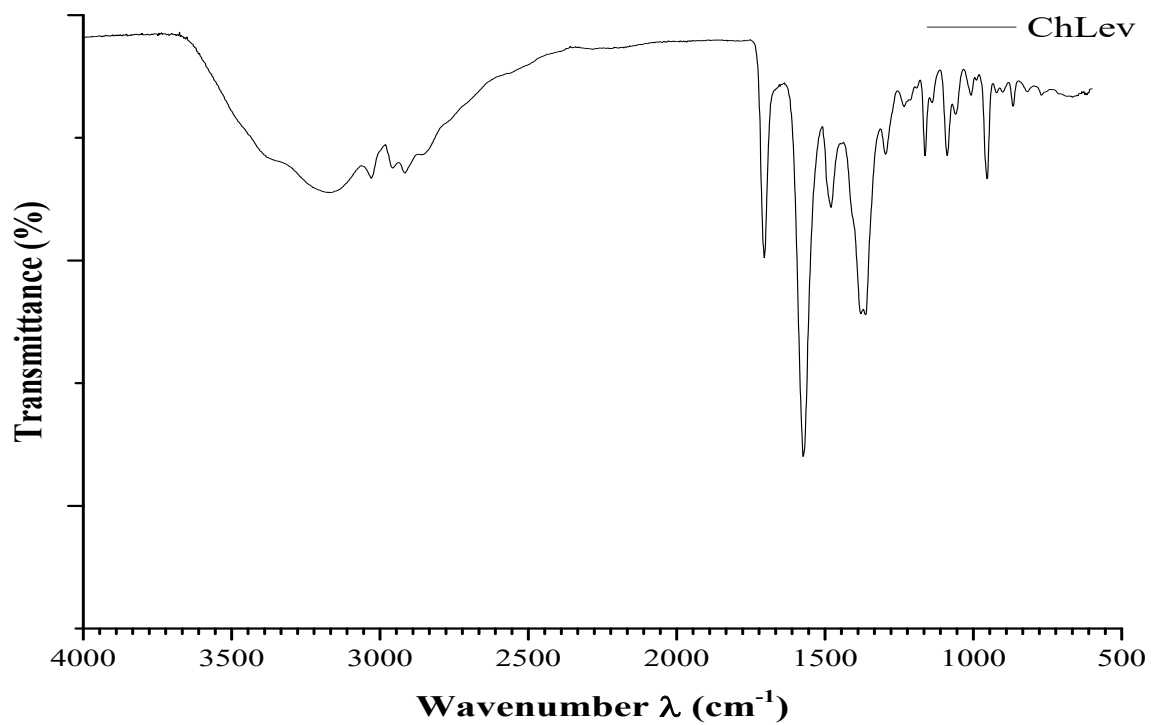

**Figure S14.** FTIR spectrum of ChLev.

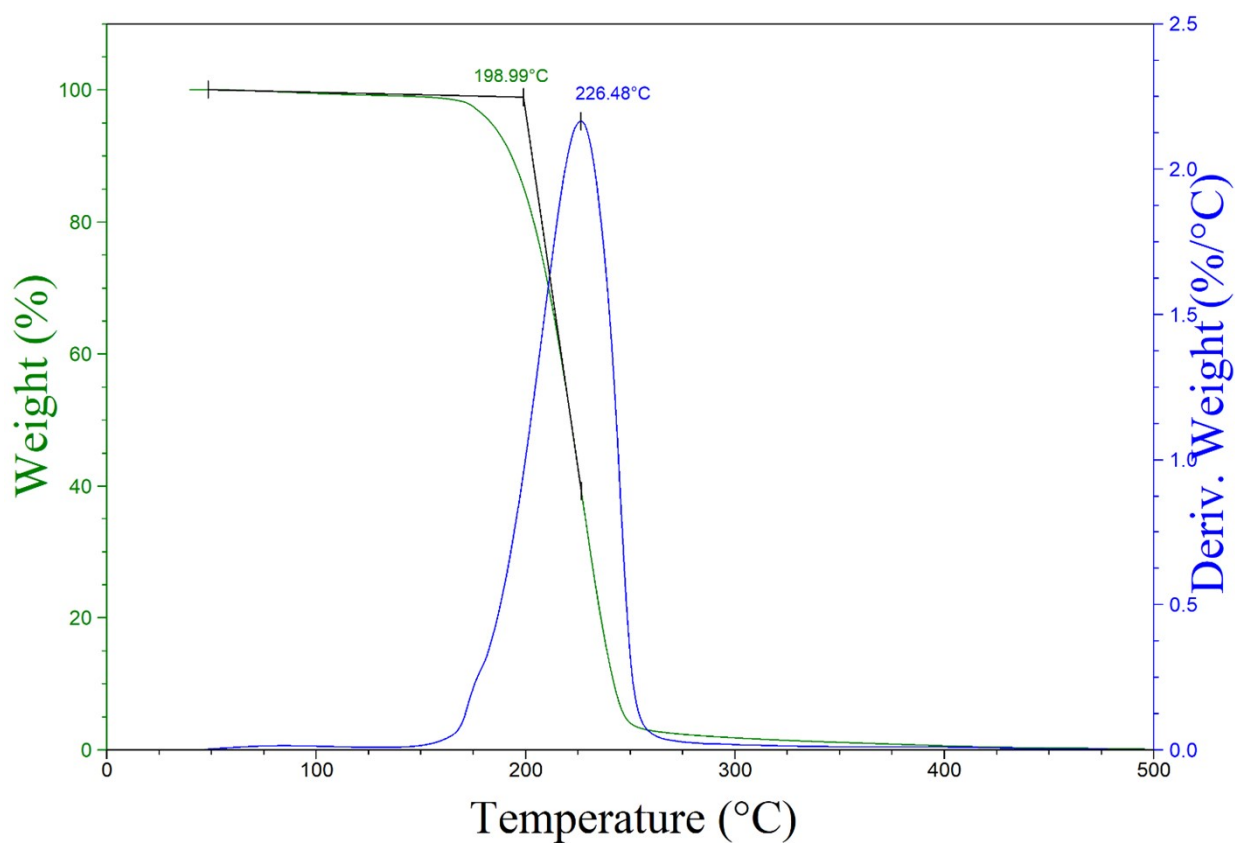

**Figure S15.** TG and DTG curves of ChLeV.

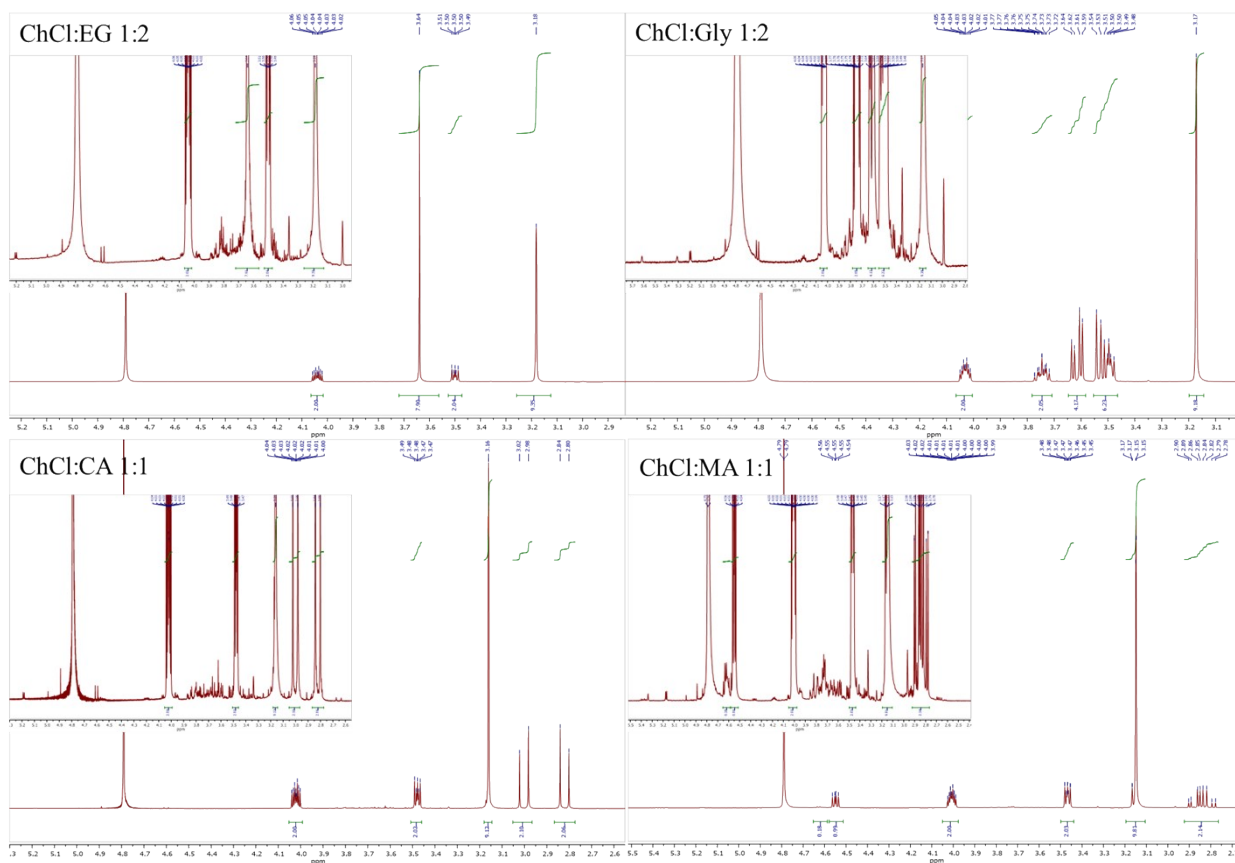

**Figure S16.** Some examples of  $^1\text{H}$  NMR of recovered (NA)DESs after polyphenols extraction in  $\text{D}_2\text{O}$  and their enlargements.

**Table S1.** Amount ( $\mu\text{g/g} \pm$  standard deviation of dried cherry pomace waste (CPW)) of phenols identified in six different CPW extracts obtained by classical solvents and (NA)DESs.

| Peak                              | Compounds                                                                | <i>n</i> -BuOH     | ChCl:EG           | ChCl:Gly         | ChCl:OA           | ChCl:MA            | ChCl:CA           |
|-----------------------------------|--------------------------------------------------------------------------|--------------------|-------------------|------------------|-------------------|--------------------|-------------------|
| <i>Phenolic acids</i>             |                                                                          |                    |                   |                  |                   |                    |                   |
| <b>1a, 1b</b>                     | Dihydroxy benzoic acid (isomers I and II)                                | 80.2 $\pm$ 3.6     | 179 $\pm$ 23      | 126 $\pm$ 18     | 271 $\pm$ 38      | 241 $\pm$ 3.9      | 85.6 $\pm$ 4.8    |
| <b>2</b>                          | Chlorogenic acid                                                         | 7.85 $\pm$ 0.44    | 8.32 $\pm$ 1.9    | 12.4 $\pm$ 0.97  | 19.4 $\pm$ 4.7    | 12.7 $\pm$ 0.43    | 4.40 $\pm$ 0.18   |
| <b>3a, 3b</b>                     | 3- <i>p</i> -Coumaroylquinic acid                                        | 24.6 $\pm$ 1.1     | 21.6 $\pm$ 4.7    | 46.8 $\pm$ 6.6   | 49.8 $\pm$ 9.2    | 0.0184 $\pm$ 0.29  | 11.0 $\pm$ 1.2    |
| <b>5a, 5b</b>                     | 3- <i>O</i> -Feruloylquinic acid (isomers <i>cis</i> and <i>trans</i> )  | 2.04 $\pm$ 0.13    | 7.42 $\pm$ 2.4    | 3.94 $\pm$ 0.59  | 4.73 $\pm$ 0.81   | 2.02 $\pm$ 0.098   | 1.09 $\pm$ 0.084  |
| <b>6a, 6b</b>                     | 4- <i>p</i> -Coumaroylquinic acid (isomers <i>cis</i> and <i>trans</i> ) | 4.04 $\pm$ 0.025   | 4.22 $\pm$ 1.1    | 13.7 $\pm$ 2.0   | 37.6 $\pm$ 6.2    | 19.8 $\pm$ 1.0     | 6.44 $\pm$ 0.61   |
| <i>Flavonoid glycosides</i>       |                                                                          |                    |                   |                  |                   |                    |                   |
| <b>4</b>                          | Kaempferol <i>O</i> -rutinoside                                          | 0.0231 $\pm$ 0.025 | 27.1 $\pm$ 7.2    | 5.30 $\pm$ 1.4   | 8.73 $\pm$ 2.3    | 19.4 $\pm$ 0.23    | 8.09 $\pm$ 0.23   |
| <b>7</b>                          | Quercetin <i>O</i> -glucoside <i>O</i> -rutinoside                       | 4.60 $\pm$ 0.27    | 15.6 $\pm$ 2.3    | 16.8 $\pm$ 2.1   | 4.65 $\pm$ 1.8    | 1.20 $\pm$ 0.12    | 2.52 $\pm$ 0.089  |
| <b>8</b>                          | Kaempferol <i>O</i> -glucoside <i>O</i> -rutinoside                      | 0.704 $\pm$ 0.040  | 2.28 $\pm$ 0.30   | 24.3 $\pm$ 0.34  | 0.61 $\pm$ 0.22   | 0.0810 $\pm$ 0.027 | 0.316 $\pm$ 0.051 |
| <b>9</b>                          | Rutin                                                                    | 68.6 $\pm$ 5.3     | 131 $\pm$ 15      | 132 $\pm$ 18     | 32.9 $\pm$ 1.5    | 20.9 $\pm$ 0.70    | 26.5 $\pm$ 2.1    |
| <b>10</b>                         | Apigenin <i>C</i> -glucoside                                             | 14.5 $\pm$ 0.42    | 31.3 $\pm$ 3.1    | 24.6 $\pm$ 3.6   | 25.3 $\pm$ 5.0    | 16.9 $\pm$ 0.55    | 9.24 $\pm$ 0.86   |
| <b>11</b>                         | Quercetin <i>O</i> -glucoside                                            | 20.7 $\pm$ 0.88    | 30.0 $\pm$ 3.3    | 30.2 $\pm$ 3.8   | 6.00 $\pm$ 2.8    | 3.17 $\pm$ 0.077   | 3.91 $\pm$ 0.2    |
| <b>12</b>                         | Kaempferol <i>O</i> -rutinoside                                          | 12.7 $\pm$ 0.38    | 21.7 $\pm$ 3.3    | 22.8 $\pm$ 2.4   | 5.71 $\pm$ 2.4    | 3.84 $\pm$ 0.086   | 4.51 $\pm$ 0.097  |
| <b>13</b>                         | Kaempferol <i>O</i> -glucoside                                           | 6.64 $\pm$ 0.35    | 8.47 $\pm$ 0.83   | 9.85 $\pm$ 1.2   | 2.91 $\pm$ 1.7    | 0.938 $\pm$ 0.12   | 1.28 $\pm$ 0.11   |
| <b>15a, 15b</b>                   | Naringenin <i>O</i> -hexoside I                                          | 5.58 $\pm$ 0.32    | 21.6 $\pm$ 3.1    | 7.56 $\pm$ 0.87  | 3.24 $\pm$ 1.9    | 0.019 $\pm$ 0.017  | 1.14 $\pm$ 0.13   |
| <b>17</b>                         | Chrysin <i>O</i> -glucoside                                              | 25.5 $\pm$ 1.1     | 0.133 $\pm$ 0.027 | 48.8 $\pm$ 4.8   | 3.45 $\pm$ 0.63   | 2.43 $\pm$ 0.066   | 1.23 $\pm$ 0.16   |
| <b>18a, 18b</b>                   | Naringenin <i>O</i> -hexoside II                                         | 12.0 $\pm$ 0.74    | 21.5 $\pm$ 2.2    | 12.9 $\pm$ 1.6   | 9.50 $\pm$ 1.8    | 4.25 $\pm$ 0.27    | 4.14 $\pm$ 0.19   |
| <b>22</b>                         | Dihydrowogonin 7- <i>O</i> - $\beta$ -D-glucopyranoside                  | 3.70 $\pm$ 0.10    | 6.88 $\pm$ 0.89   | 6.44 $\pm$ 0.092 | 5.41 $\pm$ 3.9    | 1.78 $\pm$ 0.081   | 2.02 $\pm$ 0.13   |
| <i>Flavonoid aglycones</i>        |                                                                          |                    |                   |                  |                   |                    |                   |
| <b>14</b>                         | Aromadendrin                                                             | 7.63 $\pm$ 0.23    | 5.31 $\pm$ 0.50   | 5.79 $\pm$ 0.64  | 0.632 $\pm$ 0.053 | 0.513 $\pm$ 0.016  | 0.302 $\pm$ 0.070 |
| <b>16</b>                         | Quercetin                                                                | 11.1 $\pm$ 0.62    | 19.3 $\pm$ 3.2    | 2.58 $\pm$ 0.11  | 1.67 $\pm$ 0.48   | 27.9 $\pm$ 0.91    | 3.85 $\pm$ 0.40   |
| <b>19</b>                         | Naringenin                                                               | 4.28 $\pm$ 0.28    | 5.03 $\pm$ 0.61   | 2.52 $\pm$ 0.38  | 4.91 $\pm$ 0.61   | 2.84 $\pm$ 0.076   | 2.20 $\pm$ 0.17   |
| <b>20</b>                         | Apigenin                                                                 | 11.2 $\pm$ 0.31    | 15.2 $\pm$ 1.6    | 9.00 $\pm$ 1.1   | 4.62 $\pm$ 1.2    | 4.41 $\pm$ 0.070   | 2.58 $\pm$ 0.16   |
| <b>21</b>                         | Naringenin isomer                                                        | 8.88 $\pm$ 0.31    | 5.95 $\pm$ 0.67   | 6.34 $\pm$ 0.79  | 0.630 $\pm$ 0.35  | 0.618 $\pm$ 0.017  | 2.48 $\pm$ 0.17   |
| <b>23</b>                         | Chrysin                                                                  | 34.1 $\pm$ 0.24    | 75.2 $\pm$ 8.0    | 22.1 $\pm$ 4.3   | 36.9 $\pm$ 6.4    | 32.0 $\pm$ 0.57    | 17.1 $\pm$ 0.73   |
| <b>24</b>                         | Dihydrowogonin                                                           | 13.8 $\pm$ 0.92    | 20.6 $\pm$ 2.7    | 9.18 $\pm$ 1.6   | 5.66 $\pm$ 2.0    | 3.61 $\pm$ 0.17    | 4.09 $\pm$ 0.17   |
| <i>Anthocyanins</i>               |                                                                          |                    |                   |                  |                   |                    |                   |
| <b>25</b>                         | Cyanidin 3- <i>O</i> -rutinoside                                         | 0.43 $\pm$ 0.046   | 96.8 $\pm$ 6.8    | 28.3 $\pm$ 4.9   | 29.2 $\pm$ 4.0    | 65.0 $\pm$ 3.9     | 41.6 $\pm$ 4.3    |
| <b>26</b>                         | Cyanidin 3- <i>O</i> -glucoside                                          | 5.28 $\pm$ 0.99    | 6.68 $\pm$ 0.29   | 1.09 $\pm$ 0.24  | 9.14 $\pm$ 0.92   | 20.8 $\pm$ 2.3     | 3.72 $\pm$ 0.75   |
| <b>Total phenolic acids</b>       |                                                                          | 119 $\pm$ 5.3      | 221 $\pm$ 33      | 203 $\pm$ 28     | 382 $\pm$ 59      | 275 $\pm$ 41       | 108 $\pm$ 6.9     |
| <b>Total flavonoid glycosides</b> |                                                                          | 175 $\pm$ 9.9      | 318 $\pm$ 32      | 320 $\pm$ 40     | 108 $\pm$ 26      | 75.0 $\pm$ 2.3     | 64.9 $\pm$ 4.3    |
| <b>Total flavonoid aglycones</b>  |                                                                          | 67.9 $\pm$ 1.8     | 117 $\pm$ 13      | 46.6 $\pm$ 7.8   | 47.8 $\pm$ 9.9    | 40.6 $\pm$ 0.82    | 26.3 $\pm$ 1.2    |
| <b>Total anthocyanins</b>         |                                                                          | 5.71 $\pm$ 1.0     | 103 $\pm$ 7.1     | 29.4 $\pm$ 5.1   | 38.3 $\pm$ 4.9    | 85.8 $\pm$ 6.2     | 45.3 $\pm$ 5.0    |
| <b>Total phenols</b>              |                                                                          | 368 $\pm$ 18       | 759 $\pm$ 85      | 599 $\pm$ 81     | 576 $\pm$ 99      | 495 $\pm$ 15       | 245 $\pm$ 17      |

Peak numbers correspond to those of Figure 3.

**Table S2.** Amount ( $\mu\text{g/g} \pm$  standard deviation of dried cherry pomace waste (CPW)) of phenols identified in six different CPW extracts obtained by (NA)DESSs.

| Peak                              | Compounds                                                                | L-Pro:EG          | L-Pro:Gly            | L-Pro:OA             | Bet:EG            | Bet:Gly             | Bet:OA             |
|-----------------------------------|--------------------------------------------------------------------------|-------------------|----------------------|----------------------|-------------------|---------------------|--------------------|
| <i>Phenolic acids</i>             |                                                                          |                   |                      |                      |                   |                     |                    |
| <b>1a, 1b</b>                     | Dihydroxy benzoic acid (isomers I and II)                                | 118 $\pm$ 11      | 108 $\pm$ 6.7        | 118 $\pm$ 7.8        | 145 $\pm$ 30      | 122 $\pm$ 1.9       | 115 $\pm$ 9.1      |
| <b>2</b>                          | Chlorogenic acid                                                         | 5.14 $\pm$ 0.35   | 1.83 $\pm$ 0.12      | 2.44 $\pm$ 0.29      | 2.37 $\pm$ 0.53   | 0.737 $\pm$ 0.048   | 3.77 $\pm$ 0.16    |
| <b>3a, 3b</b>                     | 4- <i>p</i> -Coumaroylquinic acid                                        | 10.7 $\pm$ 0.81   | 3.30 $\pm$ 0.33      | 1.34 $\pm$ 0.053     | 6.59 $\pm$ 1.3    | 1.66 $\pm$ 0.020    | 6.4 $\pm$ 0.52     |
| <b>5a, 5b</b>                     | 3- <i>O</i> -Feruloylquinic acid (isomers <i>cis</i> and <i>trans</i> )  | 8.80 $\pm$ 1.2    | 4.92 $\pm$ 0.23      | 12.4 $\pm$ 0.98      | 4.67 $\pm$ 1.2    | 6.17 $\pm$ 0.35     | 14.0 $\pm$ 0.88    |
| <b>6a, 6b</b>                     | 5- <i>p</i> -Coumaroylquinic acid (isomers <i>cis</i> and <i>trans</i> ) | 8.82 $\pm$ 0.94   | 5.01 $\pm$ 1.0       | 3.26 $\pm$ 0.12      | 5.71 $\pm$ 1.4    | 1.93 $\pm$ 0.12     | 6.23 $\pm$ 0.47    |
| <i>Flavonoid glycosides</i>       |                                                                          |                   |                      |                      |                   |                     |                    |
| <b>4</b>                          | Kaempferol <i>O</i> -rutinoside                                          | 2.85 $\pm$ 0.42   | 0.763 $\pm$ 0.093    | 6.52 $\pm$ 0.86      | 1.84 $\pm$ 0.44   | 0.937 $\pm$ 0.024   | 8.36 $\pm$ 1.1     |
| <b>7</b>                          | Quercetin <i>O</i> -glucoside <i>O</i> -rutinoside                       | 2.38 $\pm$ 0.21   | 0.238 $\pm$ 0.035    | 0.240 $\pm$ 0.058    | 1.69 $\pm$ 0.37   | 0.241 $\pm$ 0.012   | 0.709 $\pm$ 0.037  |
| <b>8</b>                          | Kaempferol <i>O</i> -glucoside <i>O</i> -rutinoside                      | 0.306 $\pm$ 0.043 | 0.00744 $\pm$ 0.0076 | 0.00267 $\pm$ 0.0046 | 0.209 $\pm$ 0.063 | 0.0147 $\pm$ 0.0062 | 0.101 $\pm$ 0.0043 |
| <b>9</b>                          | Rutin                                                                    | 28.3 $\pm$ 2.2    | 4.21 $\pm$ 0.52      | 5.59 $\pm$ 0.57      | 19.0 $\pm$ 4.7    | 4.62 $\pm$ 0.15     | 13.8 $\pm$ 1.0     |
| <b>10</b>                         | Apigenin <i>C</i> -glucoside                                             | 13.3 $\pm$ 1.1    | 10.5 $\pm$ 0.61      | 9.07 $\pm$ 0.68      | 13.2 $\pm$ 3.0    | 9.60 $\pm$ 0.38     | 11.4 $\pm$ 0.069   |
| <b>11</b>                         | Quercetin <i>O</i> -glucoside                                            | 4.99 $\pm$ 0.44   | 0.701 $\pm$ 0.12     | 0.790 $\pm$ 0.11     | 3.38 $\pm$ 0.80   | 0.698 $\pm$ 0.0028  | 2.48 $\pm$ 0.14    |
| <b>12</b>                         | Kaempferol <i>O</i> -rutinoside                                          | 4.84 $\pm$ 0.28   | 0.764 $\pm$ 0.064    | 0.942 $\pm$ 0.051    | 3.15 $\pm$ 0.68   | 0.823 $\pm$ 0.038   | 2.58 $\pm$ 0.22    |
| <b>13</b>                         | Kaempferol <i>O</i> -glucoside                                           | 1.42 $\pm$ 0.13   | 0.213 $\pm$ 0.0059   | 0.227 $\pm$ 0.031    | 1.10 $\pm$ 0.22   | 0.229 $\pm$ 0.017   | 0.686 $\pm$ 0.039  |
| <b>15a, 15b</b>                   | Naringenin <i>O</i> -hexoside I                                          | 1.37 $\pm$ 0.05   | 0.660 $\pm$ 0.028    | 0.437 $\pm$ 0.030    | 1.03 $\pm$ 0.24   | 0.378 $\pm$ 0.035   | 0.785 $\pm$ 0.049  |
| <b>17</b>                         | Chrysin <i>O</i> -glucoside                                              | 1.96 $\pm$ 0.16   | 1.51 $\pm$ 0.11      | 1.13 $\pm$ 0.079     | 1.93 $\pm$ 0.47   | 1.30 $\pm$ 0.045    | 1.64 $\pm$ 0.087   |
| <b>18a, 18b</b>                   | Naringenin <i>O</i> -hexoside II                                         | 4.47 $\pm$ 0.29   | 1.40 $\pm$ 0.0068    | 1.35 $\pm$ 0.048     | 4.21 $\pm$ 0.90   | 1.24 $\pm$ 0.0078   | 2.04 $\pm$ 0.072   |
| <b>22</b>                         | Dihydroxogonin 7- <i>O</i> - $\beta$ -D-glucopyranoside                  | 1.52 $\pm$ 0.081  | 0.912 $\pm$ 0.062    | 0.628 $\pm$ 0.048    | 1.69 $\pm$ 0.34   | 0.909 $\pm$ 0.05    | 0.685 $\pm$ 0.015  |
| <i>Flavonoid aglycones</i>        |                                                                          |                   |                      |                      |                   |                     |                    |
| <b>14</b>                         | Aromadendrin                                                             | 1.28 $\pm$ 0.085  | 0.181 $\pm$ 0.0045   | 0.076 $\pm$ 0.0053   | 0.378 $\pm$ 0.088 | 0.0963 $\pm$ 0.0039 | 0.587 $\pm$ 0.033  |
| <b>16</b>                         | Quercetin                                                                | 10.8 $\pm$ 0.012  | 6.42 $\pm$ 0.19      | 3.51 $\pm$ 0.28      | 6.96 $\pm$ 1.7    | 4.00 $\pm$ 0.21     | 22.6 $\pm$ 1.9     |
| <b>19</b>                         | Naringenin                                                               | 1.72 $\pm$ 0.075  | 1.32 $\pm$ 0.051     | 0.959 $\pm$ 0.074    | 1.60 $\pm$ 0.37   | 1.13 $\pm$ 0.017    | 1.67 $\pm$ 0.10    |
| <b>20</b>                         | Apigenin                                                                 | 4.35 $\pm$ 0.33   | 1.85 $\pm$ 0.13      | 1.99 $\pm$ 0.21      | 3.42 $\pm$ 0.66   | 1.770 $\pm$ 0.035   | 3.14 $\pm$ 0.20    |
| <b>21</b>                         | Naringenin isomer                                                        | 0.961 $\pm$ 0.048 | 0.522 $\pm$ 0.024    | 0.478 $\pm$ 0.027    | 0.600 $\pm$ 0.057 | 0.255 $\pm$ 0.0065  | 0.587 $\pm$ 0.031  |
| <b>23</b>                         | Chrysin                                                                  | 26.2 $\pm$ 2.2    | 13.4 $\pm$ 0.74      | 14.9 $\pm$ 1.2       | 25.2 $\pm$ 0.13   | 13.2 $\pm$ 0.67     | 18.3 $\pm$ 1.8     |
| <b>24</b>                         | Dihydroxogonin                                                           | 4.13 $\pm$ 0.44   | 1.5 $\pm$ 0.40       | 1.15 $\pm$ 0.14      | 3.11 $\pm$ 0.64   | 1.51 $\pm$ 0.0028   | 2.31 $\pm$ 0.48    |
| <i>Anthocyanins</i>               |                                                                          | MeOH-HCl          |                      |                      |                   |                     |                    |
| <b>25</b>                         | Cyanidin 3- <i>O</i> -rutinoside                                         | 10.3 $\pm$ 0.91   | 2.95 $\pm$ 0.051     | 22.8 $\pm$ 2.2       | 5.96 $\pm$ 1.4    | 3.12 $\pm$ 0.25     | 27.1 $\pm$ 1.6     |
| <b>26</b>                         | Cyanidin 3- <i>O</i> -glucoside                                          | 2.56 $\pm$ 0.21   | 1.95 $\pm$ 0.039     | 13.9 $\pm$ 0.93      | 1.2 $\pm$ 0.24    | 1.49 $\pm$ 0.096    | 11.7 $\pm$ 0.57    |
| <b>Total phenolic acids</b>       |                                                                          | 151 $\pm$ 14      | 123 $\pm$ 8.4        | 137 $\pm$ 9.2        | 164 $\pm$ 7.4     | 132 $\pm$ 2.4       | 145 $\pm$ 11       |
| <b>Total flavonoid glycosides</b> |                                                                          | 67.7 $\pm$ 5.4    | 21.9 $\pm$ 1.7       | 26.9 $\pm$ 2.6       | 52.4 $\pm$ 9.1    | 21.0 $\pm$ 0.79     | 45.3 $\pm$ 3.4     |
| <b>Total flavonoid aglycones</b>  |                                                                          | 35.6 $\pm$ 3.0    | 17.3 $\pm$ 1.3       | 18.5 $\pm$ 1.7       | 32.4 $\pm$ 1.5    | 16.7 $\pm$ 0.71     | 24.3 $\pm$ 2.5     |
| <b>Total anthocyanins</b>         |                                                                          | 12.9 $\pm$ 1.1    | 4.90 $\pm$ 0.090     | 36.7 $\pm$ 3.1       | 7.16 $\pm$ 1.6    | 4.61 $\pm$ 0.35     | 38.8 $\pm$ 2.17    |
| <b>Total phenols</b>              |                                                                          | 267 $\pm$ 24      | 167 $\pm$ 11         | 219 $\pm$ 16         | 256 $\pm$ 19      | 175 $\pm$ 4.2       | 254 $\pm$ 19       |

Peak numbers correspond to those of Figure 3.



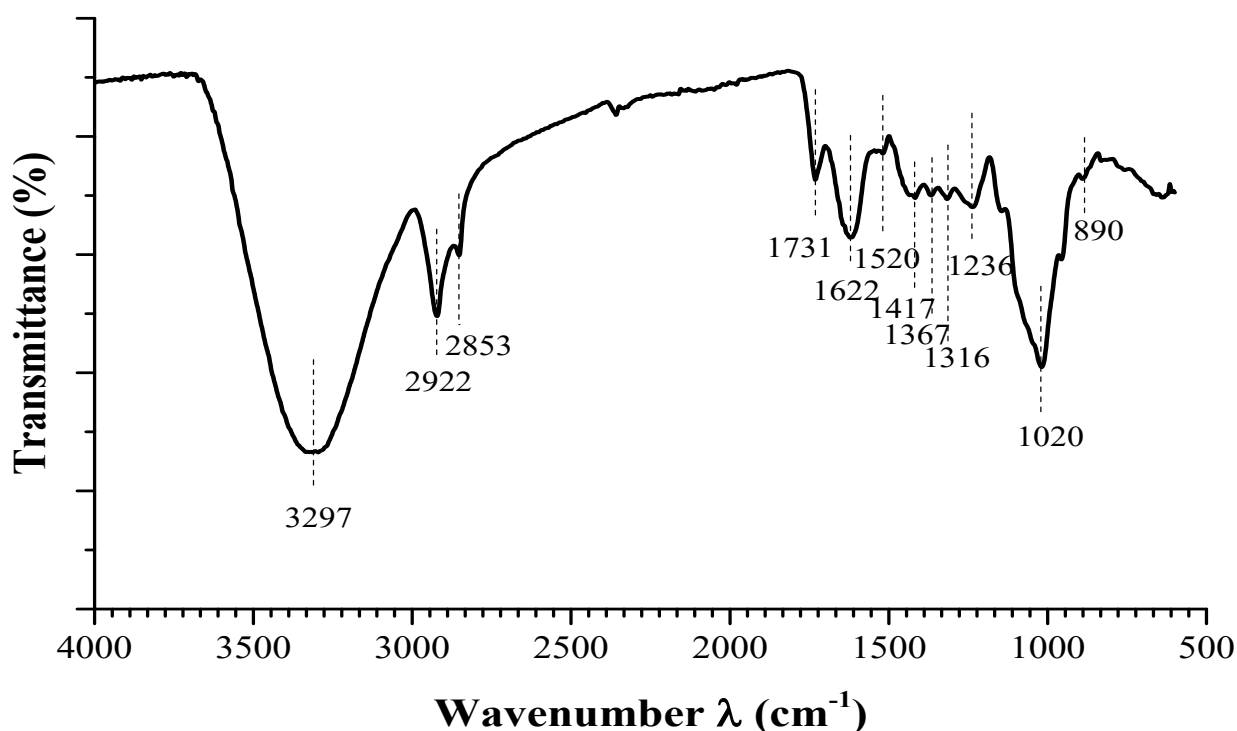

**Figure S17.** FTIR spectrum of undissolved residue obtained after polyphenols extraction with ChCl:EG.

**Table S3.** Main absorption bands and assignments related to the residue obtained after polyphenols extraction with ChCl:EG.

| Absorption bands (cm <sup>-1</sup> ) | Main Assignments                                                                                                                                                   | References |
|--------------------------------------|--------------------------------------------------------------------------------------------------------------------------------------------------------------------|------------|
| 3297                                 | stretching vibrations of the inter and intramolecular hydrogen bonds of the O-H group in cellulose, hemicellulose, pectin, and lignin                              |            |
| 2922-2853                            | Symmetric and asymmetric stretching of C-H (in methyl and methylene groups) in hemicellulose/cellulose/pectin along with the aromatic ring vibration in lignin     |            |
| 1731                                 | C=O stretching of acetyl and uronic ester groups of hemicellulose or the ester groups of ferulic and <i>p</i> -coumaric acids of lignin or methyl esters in pectin |            |
| 1622                                 | C=C deformation modes and stretching vibrations of lignin aromatic rings                                                                                           |            |
| 1520                                 | C=C stretching vibrations of lignin aromatic rings                                                                                                                 |            |
| 1417                                 | C=C deformation modes and stretching vibrations of lignin aromatic rings and C-H and O-H bending in carbohydrate fractions                                         | 7-11       |
| 1367                                 | CH <sub>2</sub> symmetrical vibration of cellulose/hemicellulose<br>OH bending vibration of pectin                                                                 |            |
| 1316                                 | CH <sub>2</sub> wagging of cellulose                                                                                                                               |            |
| 1236                                 | C-O stretching of syringyl rings, C-O stretching in lignin and hemicellulose and OH-plane deformation                                                              |            |
| 1020                                 | C-O-C ring vibrational stretching modes of cellulose/hemicellulose/pectin glycosidic linkages                                                                      |            |
| 890                                  | β-glycosidic C-H deformation with a ring vibration contribution (hexoses/pentose) characteristic of glycosidic bonds                                               |            |

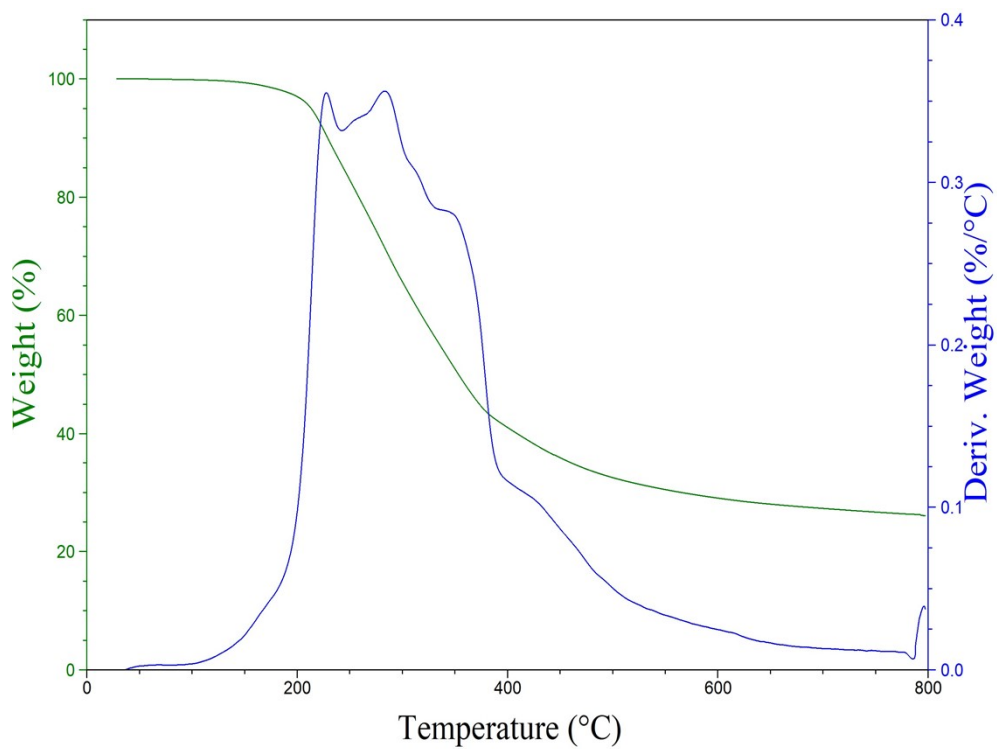

**Figure S18.** TG and DTG curves of undissolved residue obtained after polyphenols extraction with ChCl:EG.

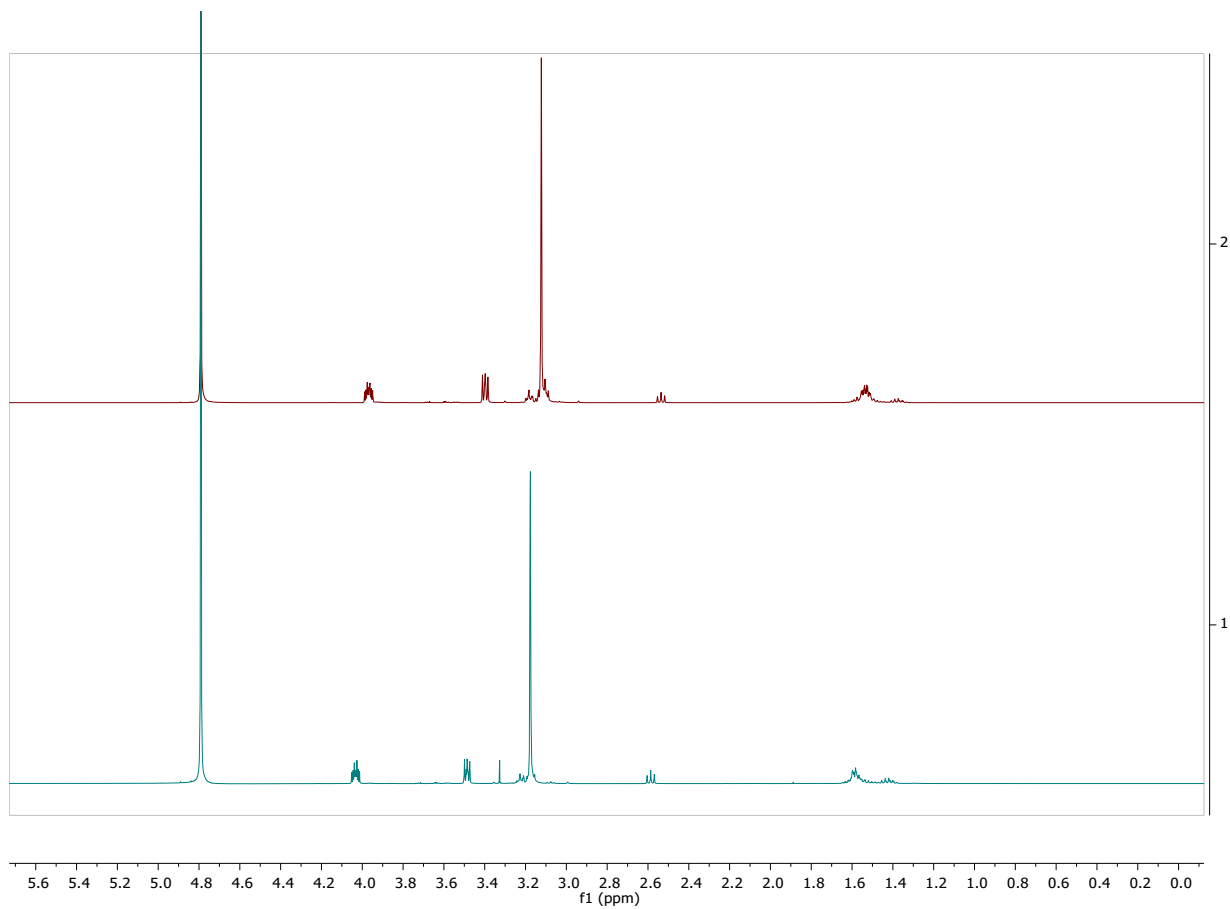

**Figure S19.**  $^1\text{H-NMR}$  comparison of fresh (top) and recovered (bottom) ChArg bio-IL.

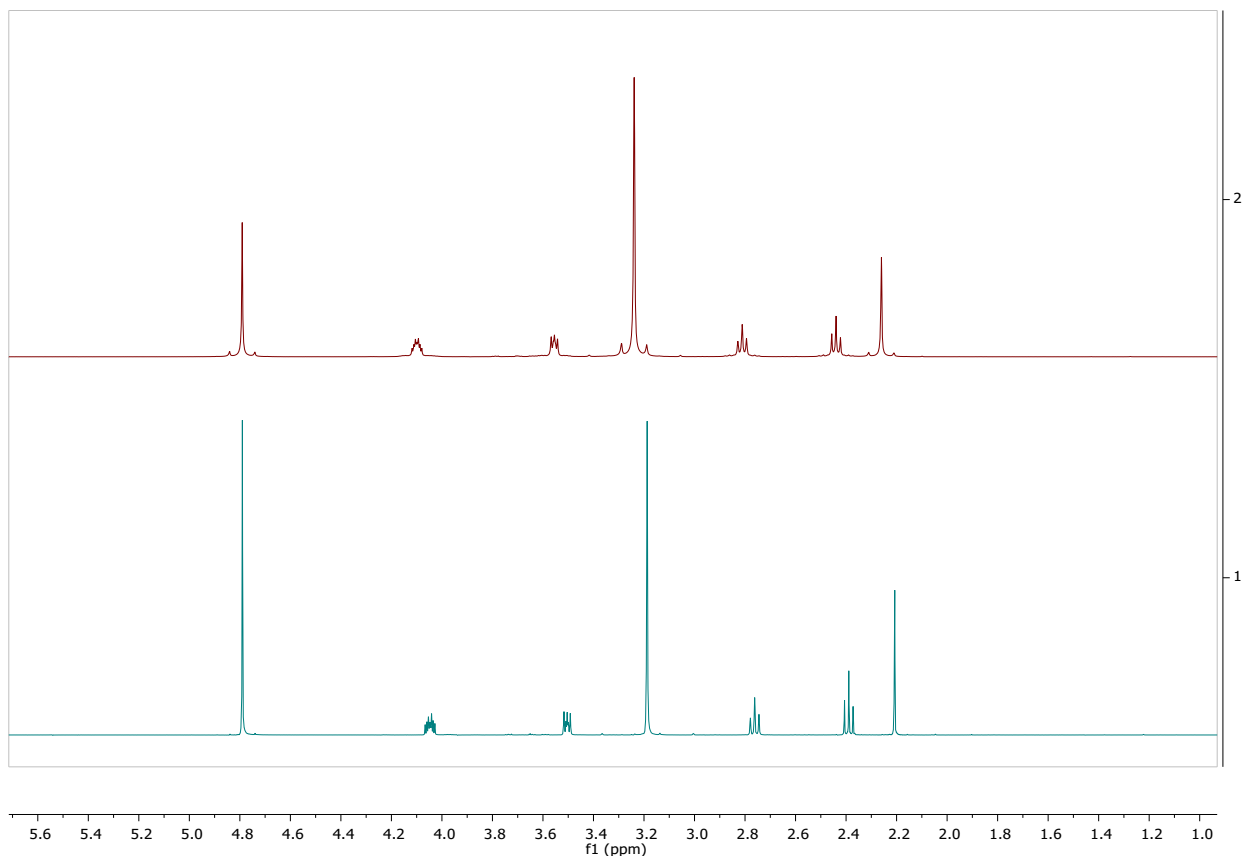

**Figure S20.**  $^1\text{H}$ -NMR comparison of fresh (top) and recovered (bottom) ChLev bio-IL.

**Table S4.** Rheological data of ionogel extracted from frequency sweep test.

| <b>Ionogel - Frequency sweep</b>                         |                                                         |                                                       |                                                                |
|----------------------------------------------------------|---------------------------------------------------------|-------------------------------------------------------|----------------------------------------------------------------|
| <b>Angular Frequency <math>\omega</math><br/>(rad/s)</b> | <b>Storage modulus, <math>G'</math><br/>(Pa), 25 °C</b> | <b>Loss Modulus, <math>G''</math><br/>(Pa), 25 °C</b> | <b>Complex viscosity <math>\eta^*</math><br/>(Pa·s), 25 °C</b> |
| 100                                                      | 16967                                                   | 3051                                                  | 172                                                            |
| 63.1                                                     | 16128                                                   | 2799.1                                                | 259                                                            |
| 39.8                                                     | 15363                                                   | 2571                                                  | 391                                                            |
| 25.1                                                     | 14671                                                   | 2358                                                  | 591                                                            |
| 15.8                                                     | 14034                                                   | 2167                                                  | 896                                                            |
| 10                                                       | 13456                                                   | 1999                                                  | 1360                                                           |
| 6.31                                                     | 12928                                                   | 1845.6                                                | 2070                                                           |
| 3.98                                                     | 12436                                                   | 1711.2                                                | 3150                                                           |
| 2.51                                                     | 11986                                                   | 1590.6                                                | 4810                                                           |
| 1.58                                                     | 11563                                                   | 1495.8                                                | 7360                                                           |
| 1                                                        | 11166                                                   | 1409.2                                                | 11200                                                          |
| 0.631                                                    | 10824                                                   | 1347.6                                                | 17300                                                          |
| 0.398                                                    | 10495                                                   | 1265.2                                                | 26500                                                          |
| 0.251                                                    | 10169                                                   | 1225.4                                                | 40800                                                          |
| 0.158                                                    | 9900.4                                                  | 1184.9                                                | 62900                                                          |
| 0.1                                                      | 9577.9                                                  | 1172.6                                                | 96500                                                          |

## References

- 1 A. B. N. Saïed, M. Khelifi, M. Aider, *Trans. ASABE*, 2017, **60**, 253–261.
- 2 J.-S. Yang, T.-H. Mu and M.-M. Ma, *Food Chem.*, 2018, **244**, 197–205.
- 3 T. Yokoyama, J. F. Kadla and H. Chang, *J. Agric. Food Chem.*, 2002, **50**, 1040–1044.
- 4 M. M. Villar-Chavero, J. C. Domínguez, M. V. Alonso, M. Oliet and F. Rodríguez, *Carbohydr. Polym.*, 2019, **207**, 775–781.
- 5 R. Ranjan, K. Rawat and H. B. Bohidar, *Phys. Chem. Chem. Phys.*, 2017, **19**, 22934–22945.
- 6 M. Irani, S. M. A. Razavi, E.-S. M. Abdel-Aal, P. Hucl and C. A. Patterson, *Int. J. Biol. Macromol.*, 2019, **124**, 270–281.
- 7 A. Mero, N. R. Moody, E. Husanu, A. Mezzetta, F. D’Andrea, C. S. Pomelli, N. Bernaert, F. Paradisi and L. Guazzelli, *Front. Chem.*, 2023, **11**, 1270221.
- 8 R. Javier-Astete, J. Jimenez-Davalos and G. Zolla, *PLoS One*, 2021, **16**, 0256559.
- 9 F. Xu, J. Yu, T. Tesso, F. Dowell and D. Wang, *Appl. Energy*, 2013, **104**, 801–809.
- 10 A. Kozioł, K. Środa-Pomianek, A. Górnjak, A. Wikiera, K. Cyprych and M. Malik, *Coatings*, 2022, **12**, 546.
- 11 M. Fasoli, R. Dell’Anna, S. Dal Santo, R. Balestrini, A. Sanson, M. Pezzotti, F. Monti and S. Zenoni, *Plant Cell Physiol.*, 2016, **57**, 1332–1349.
